# Supplementary material for: Reactivity in the nucleophilic aromatic substitution reactions of pyridinium ions
Source: Royal Society of Chemistry journal article supplement (doi:10.1039/c4ob00946k), 2014-01-01
Supplement: c4ob00946k1.pdf [file c4ob00946k1.pdf]

## Supplementary Information

### Reactivity in the Nucleophilic Aromatic Substitution Reactions of Pyridinium Ions

Jeannette T. Bowler<sup>†</sup>, Freeman M. Wong<sup>†</sup>, Scott Gronert<sup>‡,\*</sup>, James R. Keeffe<sup>†,\*</sup> and Weiming Wu<sup>†,\*</sup>

<sup>†</sup>Department of Chemistry and Biochemistry, San Francisco State University, San Francisco, CA 94132

<sup>‡</sup>Department of Chemistry, Virginia Commonwealth University, 1001 W. Main Street, Richmond, Virginia 23284.

\*Corresponding Authors: keeffe@sfsu.edu, wuw@sfsu.edu, sgronert@vcu.edu

#### Table of Contents

|                                                                                                                                                                                                                                                          |     |
|----------------------------------------------------------------------------------------------------------------------------------------------------------------------------------------------------------------------------------------------------------|-----|
| Full Reference 34.....                                                                                                                                                                                                                                   | S2  |
| Characterization of <i>N</i> -methyl-2-piperidinopyridinium.....                                                                                                                                                                                         | S2  |
| Table S1. Calculated electronic energies and zero point vibrational energies for substrates.....                                                                                                                                                         | S3  |
| Table S2. Calculated electronic energies, zero point vibrational energies and imaginary frequencies for the transition states and products for the addition of piperidine to substrates.....                                                             | S4  |
| Table S3. Calculated enthalpies of isomerization of 2-substituted to 4-substituted substrates and addition transition states.....                                                                                                                        | S5  |
| Table S4. Calculated enthalpies of solvation for substrates and transition states for the addition of piperidine to 2- and 4-substituted <i>N</i> -methylpyridinium ions.....                                                                            | S6  |
| Table S5. Calculated C-L and C-Nu distances in the transition states for addition of piperidine to 2- and 4-substituted <i>N</i> -methylpyridinium ions are in Table.....                                                                                | S7  |
| Table S6. Calculated activation enthalpies for addition of piperidine to 2- and 4-substituted <i>N</i> -methylpyridinium ions.....                                                                                                                       | S8  |
| Table S7. Calculated npa charges for substrates and transition states for the addition of piperidine to substrates.....                                                                                                                                  | S9  |
| Table S8. Calculated energies and zero point vibrational energies for the hydrogen-bonded complexes formed by addition of piperidine to 2-substituted <i>N</i> -methylpyridinium ions; electronic energies for the subsequent proton transfer event..... | S10 |
| Table S9. Enthalpies of association forming the H-bonded complexes between piperidine and the addition intermediate.....                                                                                                                                 | S10 |
| Table S10. Enthalpies of association forming the H-bonded complexes from substrates and two piperidines.....                                                                                                                                             | S11 |
| Table S11. Cartesian coordinates for computed structures in this study.....                                                                                                                                                                              | S11 |

**Reference 34:** GAUSSIAN 03, Revision B.04, Frisch, M. J.; Trucks, G. W.; Schlegel, H. B.; Scuseria, G. E.; Robb, M. A.; Cheeseman, J. R.; Montgomery, J. A., Jr.; Vreven, T.; Kudin, K. N.; Burant, J. C.; Millam, J. M.; Iyengar, S. S.; Tomasi, J.; Barone, V.; Mennucci, B.; Cossi, M.; Scalmani, G.; Rega, N.; Petersson, G. A.; Nakatsuji, H.; Hada, M.; Ehara, M.; Toyota, K.; Fukuda, R.; Hasegawa, J.; Ishida, M.; Nakajima, T.; Honda, Y.; Kitao, O.; Nakai, H.; Klene, M.; Li, X.; Knox, J. E.; Hratchian, H. P.; Cross, J. B.; Adamo, C.; Jaramillo, J.; Gomperts, R.; Stratmann, R. E.; Yazyev, O.; Austin, A. J.; Cammi, R.; Pomelli, C.; Ochterski, J. W.; Ayala, P. Y.; Morokuma, K.; Voth, G. A.; Salvador, P.; Dannenberg, J. J.; Zakrzewski, G.; Dapprich, S.; Daniels, A. D.; Strain, M. C.; Farkas, O.; Malick, D. K.; Rabuck, A. D.; Raghavachari, K.; Foresman, J. B.; Ortiz, J. V.; Cui, Q.; Baboul, A. G.; Clifford, S.; Cioslowski, J.; Stefanov, B.; Liu, G.; Liashenko, A.; Piskorz, P.; Komaromi, I.; Martin, R. L.; Fox, D. J.; Keith, T.; Al-Laham, M. A.; Peng, C. Y.; Nanayakkara, A.; Challacombe, M.; Gill, P. M. W.; Johnson, B.; Chen, W.; Wong, M. W.; Gonzalez, C.; Pople, J. A. Gaussian, Inc., Pittsburgh PA, 2003.

\* \* \*

### **Characterization of *N*-methyl-2-piperidinopyridinium**

<sup>1</sup>H NMR δ (ppm, CD<sub>3</sub>OD) 7.65 (d, 1 H, H-6, J<sub>5,6</sub> = 6.5 Hz), 7.54 (dd, 1 H, H-4, J<sub>3,4</sub> = 9.0, J<sub>4,5</sub> = 6.5 Hz), 6.56 (d, 1 H, H-3, J<sub>3,4</sub> = 9.0 Hz), 7.54 (t, 1 H, H-5, J<sub>5,6</sub> = 9.0, J<sub>4,5</sub> = 6.5 Hz), 3.58 (s, 3H, CH<sub>3</sub>), 3.17 (t, 4H, CH<sub>2</sub>NCH<sub>2</sub>), 1.81 (m, 4H, N(CH<sub>2</sub>CH<sub>2</sub>)<sub>2</sub>), 1.73 (m, 2 H N(CH<sub>2</sub>CH<sub>2</sub>)<sub>2</sub>CH<sub>2</sub>).

<sup>13</sup>C NMR δ (ppm, CD<sub>3</sub>OD) 165.51, 142.31, 140.75, 120.45, 108.71, 45.99, 38.19, 24.99, 23.45.

Mass Spectrometry (Electrospray), *m/z* calcd for C<sub>11</sub>H<sub>17</sub>N<sub>2</sub> 177.1392, found 177.1386.

**Table S1. Calculated electronic energies (hartrees) and zero-point vibrational energies (kcal/mol) for reactants in this study, using the MP2/6-31+G\* basis set.**

| Compound                                           | gas phase     | MeOH <sup>a</sup> | ZPVE <sup>b</sup> |
|----------------------------------------------------|---------------|-------------------|-------------------|
| piperidine                                         | -251.0170302  | -251.0236619      | 98.05             |
| 2-fluoro- <i>N</i> -methyl pyridinium <sup>+</sup> | -386.0467182  | -386.1293724      | 75.28             |
| 4-fluoro- <i>N</i> -methyl pyridinium <sup>+</sup> | -386.0489729  | -386.1342622      | 75.16             |
| 2-chloro- <i>N</i> -methyl pyridinium <sup>+</sup> | -746.0522295  | -746.132799       | 74.43             |
| 4-chloro- <i>N</i> -methyl pyridinium <sup>+</sup> | -746.0556179  | -746.1385096      | 74.22             |
| 2-bromo- <i>N</i> -methyl pyridinium <sup>+</sup>  | -2856.4625888 | -2856.5426627     | 74.35             |
| 4-bromo- <i>N</i> -methyl pyridinium <sup>+</sup>  | -2856.4662248 | -2856.5488446     | 74.15             |
| 2-cyano- <i>N</i> -methyl pyridinium <sup>+</sup>  | -379.0232655  | -379.1131532      | 79.29             |
| 4-cyano- <i>N</i> -methyl pyridinium <sup>+</sup>  | -379.0257207  | -379.1200407      | 79.17             |

<sup>a</sup>Solvent calculations used the polarizable continuum model (PCM) applied to the gas phase MP2/6-31+G\* structures. <sup>b</sup>Frequencies and zero-point vibrational energies were calculated at the HF/6-31+G\* level and scaled according to the recommendations of Scott, A. P.; Radom, L. *J. Phys. Chem.* **1996**, *100*, 16502-16513.

**Table S2. Calculated (MP2/6-31+G\*) electronic energies (hartrees), zero-point vibrational energies (kcal/mol), and imaginary frequencies (cm<sup>-1</sup>) for the transition states and adducts in the S<sub>N</sub>Ar addition step of piperidine with 2- and 4-substituted *N*-methylpyridinium cations<sup>a</sup>**

| substrate                   | gas phase     | MeOH          | ZPVE <sup>b</sup> | iv (cm <sup>-1</sup> ) <sup>c</sup> |
|-----------------------------|---------------|---------------|-------------------|-------------------------------------|
| 2-fluoro ts                 | -637.0855269  | -637.1606122  | 174.66            | 344                                 |
| 2-fluoro adduct             | -637.0899547  | -637.1651112  | 176.05            |                                     |
| 4-fluoro ts                 | -637.0848989  | -637.1619771  | 174.48            | 337                                 |
| 4-fluoro adduct             | -637.0979399  | -637.1778473  |                   |                                     |
| 2-chloro ts                 | -997.084363   | -997.1592617  | 173.87            | 360                                 |
| 2-chloro adduct             | -997.0853178  | -997.1602783  | 175.14            |                                     |
| 4-chloro ts                 | -997.0883589  | -997.1635713  | 173.63            | 365                                 |
| 4-chloro adduct             | -997.0956083  | -997.1740098  |                   |                                     |
| 2-bromo ts                  | -3107.5017135 | -3107.5761954 | 173.64            | 357                                 |
| 2-bromo adduct              | -3107.506171  | -3107.586517  | 174.94            |                                     |
| 4-bromo ts                  | -3107.5051105 | -3107.5749525 | 173.36            | 364                                 |
| 4-bromo adduct              | -3107.5138451 | -3107.5929581 | 175.00            |                                     |
| 2-cyano ts <sup>d</sup>     | NA            | NA            | 178.73            | 339                                 |
| 2-cyano adduct <sup>e</sup> | -630.0681109  | -630.1520134  | 179.75            |                                     |
| 4-cyano adduct <sup>e</sup> | -630.0661272  | -630.1532301  | 177.61            |                                     |
| 4-cyano ts                  | -630.0627159  | -630.1466735  | 178.65            | 354                                 |
| 4-cyano adduct              | -630.063201   | -630.1481339  | 180.07            |                                     |

<sup>a</sup>Solvent (MeOH) calculations used the polarizable continuum model (PCM) applied to the gas phase MP2/6-31+G\* geometries. <sup>b</sup>Zero-point vibrational energies were calculated at the HF/6-31+G\* level and scaled according to the recommendations of Scott, A. P.; Radom, L. *J. Phys. Chem.* **1996**, *100*, 16502. <sup>c</sup>Imaginary frequencies were calculated at the HF/6-31+G\* level. <sup>d</sup>A structure was not obtained at the MP2/6-31+G\* level. <sup>e</sup>This calculation did not converge. <sup>e</sup>The more stable cyano adducts are ion-molecule complexes, not covalent adducts.

**Table S3. Calculated enthalpies of isomerization,  $\Delta H_{\text{ISOM}}$ , 2-substituted-*N*-methylpyridinium to 4-substituted *N*-methylpyridinium cations and the transition states (ts) formed by their  $S_{\text{N}}\text{Ar}$  addition reactions with piperidine (MP2/6-31+G\*), kcal/mol.<sup>a</sup>**

| substituent     | gas phase | MeOH <sup>a</sup> |
|-----------------|-----------|-------------------|
| fluoro          |           |                   |
| substrate       | -1.5      | -3.2              |
| ts              | 0.2       | -1.0              |
| chloro          |           |                   |
| substrate       | -2.3      | -3.8              |
| ts              | -2.7      | -2.9              |
| bromo           |           |                   |
| substrate       | -2.5      | -4.1              |
| ts              | -2.4      | 0.5               |
| cyano           |           |                   |
| substrate       | -1.7      | -4.4              |
| ts <sup>b</sup> | NA        | NA                |

<sup>a</sup>Solvent (MeOH) calculations used the polarizable continuum model (PCM) applied to the gas phase MP2/6-31+G\* geometries. Zero-point vibrational energies were calculated at the HF/6-31+G\* level and scaled according to the recommendations of Scott, A. P.; Radom, L. *J. Phys. Chem.* **1996**, *100*, 16502. <sup>b</sup>The 2-cyano ts calculation did not converge.

**Table S4. Enthalpies of solvation,  $\Delta H_{\text{SOLV}}$  (kcal/mol, MP2/6-31+G\*), gas phase to methanol, for substrates and transition states in the addition of piperidine to 2- and 4-substituted *N*-methylpyridinium cations.<sup>a</sup>**

| substituent | substrate | transition state | $\Delta\Delta H_{\text{SOLV}}^b$ |
|-------------|-----------|------------------|----------------------------------|
| 2-fluoro    | -51.9     | -47.1            | 4.8                              |
| 4-fluoro    | -53.5     | -48.4            | 5.1                              |
| 2-chloro    | -50.6     | -47.0            | 3.6                              |
| 4-chloro    | -52.0     | -47.2            | 4.8                              |
| 2-bromo     | -50.2     | -46.7            | 3.5                              |
| 4-bromo     | -51.8     | -43.8            | 8.0                              |
| 2-cyano     | -56.4     | NA <sup>b</sup>  | NA <sup>b</sup>                  |
| 4-cyano     | -59.2     | -52.7            | 6.5                              |

<sup>a</sup>Solvent (MeOH) calculations used the polarizable continuum model (PCM) applied to the gas phase MP2/6-31+G\* geometries. Zero-point vibrational energies were calculated at the HF/6-31+G\* level and scaled according to the recommendations of Scott, A. P.; Radom, L. *J. Phys. Chem.* **1996**, *100*, 16502. <sup>b</sup> $\Delta\Delta H_{\text{SOLV}} = \Delta H_{\text{SOLV}}(\text{ts}) - \Delta H_{\text{SOLV}}(\text{substrate})$ . Thus, a positive value indicates more favorable solvation of the reactant than of the transition state. <sup>b</sup>A structure was not obtained at the MP2/6-31+G\* level.

**Table S5. Carbon-leaving group (C-L) and carbon-nucleophile (C-N) bond distances (Å) in substrates and transition states (ts) for the reactions of piperidine with 2- and 4-substituted *N*-methylpyridinium cations.<sup>a</sup>**

| substituent | substrate (C-L) | ts (C-L, C-N)   | % elongation (C-L) |
|-------------|-----------------|-----------------|--------------------|
| 2-fluoro    | 1.294           | 1.358, 2.104    | 4.9                |
| 4-fluoro    | 1.296           | 1.348, 2.296    | 4.0                |
| 2-chloro    | 1.706           | 1.780, 1.885    | 4.3                |
| 4-chloro    | 1.704           | 1.740, 2.192    | 2.1                |
| 2-bromo     | 1.857           | 1.949, 1.965    | 5.0                |
| 4-bromo     | 1.854           | 1.905, 2.245    | 2.8                |
| 2-cyano     | 1.442           | NA <sup>b</sup> |                    |
| 4-cyano     | 1.442           | 1.458, 1.854    | 1.1                |

<sup>a</sup>Structures were optimized at the MP2/6-31+G\* level. <sup>b</sup>A transition state structure was not found for the 2-cyano reaction.

**Table S6. Activation enthalpies (kcal/mol, MP2/6-31+G\*) calculated for the addition of piperidine to 2- and 4-substituted *N*-methylpyridinium cations.<sup>a</sup>**

| substrate | $\Delta H^\ddagger$ (gas) | $\Delta H^\ddagger$ (MeOH) | $\Delta\Delta H^\ddagger$ <sup>b</sup> |
|-----------|---------------------------|----------------------------|----------------------------------------|
| 2-fluoro  | -12.3                     | -3.4                       | 8.9                                    |
| 4-fluoro  | -10.6                     | -1.2                       | 9.4                                    |
| 2-chloro  | -8.1                      | -0.4                       | 7.7                                    |
| 4-chloro  | -8.5                      | 0.5                        | 9.0                                    |
| 2-bromo   | -12.6                     | -5.0                       | 7.6                                    |
| 4-bromo   | -12.6                     | -0.4                       | 12.2                                   |
| 2-cyano   | NA <sup>c</sup>           | NA <sup>c</sup>            | NA                                     |
| 4-cyano   | -11.1                     | -0.4                       | 10.7                                   |

<sup>a</sup>Solvent (MeOH) calculations used the polarizable continuum model (PCM) applied to the gas phase MP2/6-31+G\* geometries. Zero-point vibrational energies were calculated at the HF/6-31+G\* level and scaled according to the recommendations of Scott, A. P.; Radom, L. *J. Phys. Chem.* **1996**, *100*, 16502. <sup>b</sup>The difference in activation enthalpies, (MeOH – gas). The average difference is  $9.4 \pm 1.2$  kcal/mol. <sup>c</sup>A structure was not found at the MP2/6-31+G\* level.



**Table S7. Calculated npa charges on the reacting carbon (C) and the leaving group (X), gas phase and in methanol, for substrates and transition states (ts) in the  $S_NAr$  addition step of piperidine with 2- and 4-substituted *N*-methylpyridinium cations, and also for the 2- and 4-cyano-*N*-methylpyridinium+ adducts with piperidine.<sup>a</sup>**

| substituent (X) | substrate (gas)         | ts (gas)                           | substrate (MeOH)         | ts (MeOH)                          |
|-----------------|-------------------------|------------------------------------|--------------------------|------------------------------------|
| 2-fluoro        | C = 0.659<br>X = -0.288 | C = 0.673<br>X = -0.328            | C = 0.668<br>X = -0.306  | C = 0.672<br>X = -0.338            |
| 4-fluoro        | C = 0.482<br>X = -0.291 | C = 0.486<br>X = -0.312            | C = 0.471<br>X = -0.319  | C = 0.479<br>X = -0.332            |
| 2-chloro        | C = 0.161<br>X = 0.160  | C = 0.236<br>X = 0.055             | C = 0.167<br>X = 0.133   | C = 0.239<br>X = 0.036             |
| 4-chloro        | C = -0.032<br>X = 0.151 | C = 0.008<br>X = 0.091             | C = -0.036<br>X = 0.101  | C = -0.008<br>X = 0.058            |
| 2-bromo         | C = 0.084<br>X = 0.238  | C = 0.171<br>X = 0.116             | C = 0.090<br>X = 0.238   | C = 0.175<br>X = 0.092             |
| 4-bromo         | C = -0.112<br>X = 0.227 | C = -0.076<br>X = 0.159            | C = 0.114<br>X = 0.170   | C = -0.055<br>X = 0.097            |
| 2-cyano         | C = 0.129<br>X = 0.051  | C = NA<br>X = NA                   | C = 0.120<br>X = 0.013   | C = NA<br>X = NA                   |
| 4-cyano         | C = -0.082<br>X = 0.067 | C = -0.057<br>X = 0.027            | C = -0.106<br>X = 0.015  | C = -0.068<br>X = -0.004           |
| 2-cyano adduct  | C = 0.148<br>X = 0.025  | NA <sup>b</sup><br>NA <sup>b</sup> | C = 0.132<br>C = 0.016   | NA <sup>b</sup><br>NA <sup>b</sup> |
| 4-cyano adduct  | C = -0.029<br>X = 0.025 | C = -0.057<br>X = 0.027            | C = -0.036<br>X = -0.004 | C = -0.068<br>X = -0.004           |

<sup>a</sup>Solvent (MeOH) calculations used the polarizable continuum model (PCM) applied to the gas phase MP2/6-31+G\* geometries. The charges listed for the cyano group are for the entire group. <sup>b</sup>The 2-cyano ts calculation did not converge.

**Table S8. Calculated electronic energies (hartrees) and zero-point vibrational energies (kcal/mol) for H-bonded complexes between piperidine and the addition products (I-1) from 2-substituted-*N*-methylpyridinium ions and for 4-cyano-*N*-methylpyridinium ion. Electronic energies for the subsequent proton transfer transition states, MP2/6-31+G\*.**

| Compound | $E_{CX, \text{ gas}}$ | $E_{CX, \text{ MeOH}}^a$ | $E_{ts, \text{ gas}}$ | ZPVE <sup>b, c</sup> |
|----------|-----------------------|--------------------------|-----------------------|----------------------|
| 2-fluoro | -888.1403284          | -888.2076163             | -888.1373313          | 275.30               |
| 2-chloro | -1248.1360087         | -1248.2018047            | -1248.1335027         | 274.39               |
| 2-bromo  | -3358.5561394         | -3358.6242215            | -3358.5547237         | 274.22               |
| 2-cyano  | -881.107446           | -881.1777844             | -881.1043014          | 279.06               |
| 4-cyano  | -881.1216773          | -881.1927856             | -881.1177383          | 279.24               |

<sup>a</sup>Solvent calculations used the polarizable continuum model (PCM) applied to the gas phase MP2/6-31+G\* structures. <sup>b</sup>Frequencies and zero-point vibrational energies were calculated at the HF/6-31+G\* level and scaled according to the recommendations of Scott, A. P.; Radom, L. *J. Phys. Chem.* **1996**, *100*, 16502. <sup>c</sup>ZPVE values are for the complexes.

**Table S9. Enthalpies of hydrogen-bonded complex formation,  $\Delta H_{CX}$ , for the association of the addition intermediate (I-1) with piperidine and activation enthalpies for proton transfer from this complex, (kcal/mol, MP2/6-31+G\*)<sup>a</sup>**

| substrate | $\Delta H_{CX}(\text{ gas})$ | $\Delta H_{CX}(\text{ MeOH})$ | $\Delta H^\ddagger(\text{ gas})$ |
|-----------|------------------------------|-------------------------------|----------------------------------|
| 2-fluoro  | -19.7                        | -10.6                         | -0.5                             |
| 2-chloro  | -19.9                        | -0.8                          | -0.8                             |
| 2-bromo   | -19.4                        | -7.6                          | -1.5                             |
| 2-cyano   | -12.7                        | -0.1                          | -0.4                             |
| 4-cyano   | -20.6                        | -6.4                          | -0.1                             |

<sup>a</sup>Solvent (MeOH) calculations used the polarizable continuum model (PCM) applied to the gas phase MP2/6-31+G\* geometries. Zero-point vibrational energies were calculated at the HF/6-31+G\* level and scaled according to the recommendations of Scott, A. P.; Radom, L. *J. Phys. Chem.* **1996**, *100*, 16502.

**Table 10. Enthalpies of hydrogen-bonded complex formation,  $\Delta H_{CX}^{\circ}$ , from substrates and two piperidines (kcal/mol, MP2/6-31+G\*<sup>a</sup>).**

| substrate | $\Delta H_{CX}^{\circ}$ (gas) | $\Delta H_{CX}^{\circ}$ (MeOH) |
|-----------|-------------------------------|--------------------------------|
| 2-fluoro  | -31.9                         | -12.3                          |
| 2.chloro  | -27.1                         | -6.2                           |
| 2-bromo   | -33.6                         | -17.7                          |
| 2-cyano   | -27.8                         | -7.2                           |
| 4-cyano   | -34.9                         | -12.0                          |

<sup>a</sup>Solvent (MeOH) calculations used the polarizable continuum model (PCM) applied to the gas phase MP2/6-31+G\* geometries. Zero-point vibrational energies were calculated at the HF/6-31+G\* level and scaled according to the recommendations of Scott, A. P.; Radom, L. *J. Phys. Chem.* **1996**, *100*, 16502.

\* \* \*

**Table S11. Cartesian coordinates for compounds in this study, MP2/6-31+G\*.**

|               |           |           |           |
|---------------|-----------|-----------|-----------|
| piperidine    |           |           |           |
| H             | -0.794935 | -2.235383 | 0.000000  |
| N             | -0.707819 | -1.218801 | 0.000000  |
| C             | -0.012981 | -0.776452 | 1.211503  |
| C             | -0.012981 | -0.776452 | -1.211503 |
| C             | -0.012981 | 0.747593  | 1.258144  |
| H             | 1.033718  | -1.139057 | 1.247233  |
| H             | -0.537179 | -1.190399 | 2.079975  |
| H             | -0.537179 | -1.190399 | -2.079975 |
| H             | 1.033718  | -1.139057 | -1.247233 |
| C             | -0.012981 | 0.747593  | -1.258144 |
| H             | -1.052123 | 1.093589  | 1.326120  |
| H             | 0.511689  | 1.093208  | 2.158118  |
| C             | 0.642386  | 1.320161  | 0.000000  |
| H             | 0.511689  | 1.093208  | -2.158118 |
| H             | -1.052123 | 1.093589  | -1.326120 |
| H             | 0.582917  | 2.415582  | 0.000000  |
| H             | 1.711760  | 1.062070  | 0.000000  |
| piperidinium+ |           |           |           |
| C             | 0.696859  | -1.262969 | 0.245935  |
| C             | 0.696868  | 1.262965  | 0.245935  |

C -0.745673 -1.258461 -0.231092  
H 0.768074 -1.256933 1.337648  
H 1.272324 -2.107476 -0.141940  
H 1.272338 2.107468 -0.141940  
H 0.768082 1.256928 1.337648  
C -0.745664 1.258466 -0.231091  
H -0.772205 -1.337455 -1.326699  
H -1.230211 -2.161351 0.155012  
C -1.481852 0.000005 0.229854  
H -1.230196 2.161359 0.155012  
H -0.772195 1.337461 -1.326699  
H -2.501566 0.000009 -0.166262  
H -1.569398 0.000005 1.324306  
N 1.384739 -0.000005 -0.227212  
H 2.365580 -0.000008 0.084081  
H 1.412973 -0.000005 -1.256931

2-fluoro-N-methylpyridinium+

H -2.985935 0.814329 0.000072  
C -1.982316 0.431461 0.000030  
C -0.914056 1.306584 -0.000033  
C -1.755700 -0.946933 0.000048  
C -0.468505 -1.400563 -0.000019  
H -1.025417 2.373190 -0.000013  
H -2.566112 -1.649051 0.000111  
H -0.223206 -2.443396 -0.000034  
N 0.577011 -0.545846 -0.000124  
C 1.977956 -1.047558 0.000057  
C 0.347441 0.762931 -0.000083  
F 1.403104 1.511020 0.000056  
H 2.480765 -0.693979 0.886183  
H 2.481983 -0.691274 -0.884258  
H 1.941993 -2.123608 -0.001693

2-chloro-N-methylpyridinium+

H 2.576201 -2.031371 -0.000023  
C 1.879615 -1.213641 -0.000007  
C 0.520272 -1.466982 -0.000016  
C 2.332929 0.100775 0.000013  
C 1.408367 1.108595 0.000007  
H 0.131094 -2.465815 -0.000044  
H 3.378327 0.340008 0.000024  
H 1.693643 2.140829 -0.000004  
N 0.084697 0.862050 0.000007  
C -0.858338 2.011719 -0.000015  
C -0.359215 -0.404802 0.000011  
Cl -2.040734 -0.687622 0.000007  
H -1.472655 1.970304 0.885222

H -1.472711 1.970220 -0.885211  
H -0.276076 2.917076 -0.000086

2-bromo-N-methylpyridinium+

H -2.690057 -2.380200 -0.000083  
C -2.150836 -1.450971 -0.000064  
C -0.767817 -1.459758 0.000011  
C -2.831164 -0.239862 -0.000112  
C -2.094760 0.912742 -0.000107  
H -0.214713 -2.377585 0.000037  
H -3.902238 -0.187680 -0.000167  
H -2.558254 1.878186 -0.000161  
N -0.749240 0.905498 -0.000027  
C -0.035913 2.209587 -0.000041  
C -0.084482 -0.261860 0.000048  
Br 1.772148 -0.259681 0.000065  
H 0.574951 2.283146 -0.885523  
H 0.574783 2.283261 0.885547  
H -0.775151 2.991956 -0.000164

2-cyano-N-methylpyridinium+

H -2.558825 -2.024974 0.000773  
C -1.848880 -1.219073 0.000185  
C -0.482222 -1.494360 0.000117  
C -2.273362 0.094388 -0.000104  
C -1.326612 1.099865 -0.000369  
H -0.109641 -2.500288 0.000667  
H -3.314199 0.353582 0.000099  
H -1.603396 2.134988 -0.000462  
N -0.022377 0.833728 -0.000214  
C 0.962095 1.950942 0.000397  
C 0.405188 -0.448634 -0.000220  
H 1.574802 1.882606 -0.885102  
H 1.573413 1.882405 0.886825  
H 0.416574 2.879164 0.000271  
C 1.826813 -0.687470 -0.000150  
N 2.942827 -0.888218 -0.000101

4-fluoro-N-methylpyridinium+

C 0.629621 -1.180894 -0.012261  
N 1.297407 0.000271 -0.020155  
C 0.629391 1.181229 -0.012219  
C 2.782614 -0.000195 0.022607  
C -0.755274 -1.214848 -0.001838  
H 1.233914 -2.082385 -0.016103  
C -0.755568 1.214842 -0.001865  
H 1.233327 2.082930 -0.016017  
C -1.437033 -0.000053 0.003767

H -1.289357 -2.160348 -0.000072  
H -1.289845 2.160231 -0.000119  
F -2.770073 -0.000238 0.011015  
H 3.145320 0.894703 -0.481133  
H 3.145232 -0.885447 -0.498037  
H 3.107714 -0.009928 1.064290

4-chloro-N-methylpyridinium+

C -1.063515 1.178872 -0.012800  
N -1.733995 0.000001 -0.020397  
C -1.063510 -1.178877 -0.012805  
C -3.217704 -0.000004 0.025691  
C 0.321569 1.207241 -0.004499  
H -1.665236 2.082362 -0.016823  
C 0.321570 -1.207229 -0.004493  
H -1.665244 -2.082358 -0.016829  
C 1.031684 0.000008 0.001942  
H 0.837710 2.162983 -0.002775  
H 0.837728 -2.162962 -0.002772  
Cl 2.736294 -0.000004 0.007412  
H -3.582003 -0.890328 -0.485199  
H -3.582011 0.890247 -0.485313  
H -3.540529 0.000058 1.068268

4-bromo-N-methylpyridinium+

C 1.709800 -1.173136 -0.000015  
N 2.377530 0.008297 -0.000034  
C 1.706123 1.184767 -0.000013  
C 3.861928 -0.010707 0.000009  
C 0.325234 -1.204641 0.000028  
H 2.316572 -2.074129 -0.000043  
C 0.319293 1.209987 0.000026  
H 2.303174 2.091139 -0.000038  
C -0.387272 0.002196 0.000066  
H -0.187021 -2.162464 0.000012  
H -0.195711 2.166301 0.000008  
Br -2.249392 -0.002616 -0.000010  
H 4.224174 1.015946 -0.000585  
H 4.207111 -0.527565 -0.896205  
H 4.207085 -0.526538 0.896828

4-cyano-N-methylpyridinium+

C -0.969749 -1.176026 -0.000004  
N -1.633253 0.008577 -0.000006  
C -0.965003 1.187752 -0.000003  
C -3.120028 -0.009872 0.000006  
C 0.415944 -1.208968 0.000001  
H -1.580793 -2.073944 -0.000006

|   |           |           |           |
|---|-----------|-----------|-----------|
| C | 0.422995  | 1.212202  | 0.000000  |
| C | 1.130603  | 0.000651  | 0.000002  |
| H | 0.930528  | -2.166072 | 0.000002  |
| H | 0.941926  | 2.166934  | 0.000001  |
| H | -3.482017 | 1.016727  | -0.000087 |
| H | -3.462050 | -0.527176 | 0.897166  |
| H | -3.462062 | -0.527339 | -0.897054 |
| C | 2.563393  | -0.003608 | 0.000004  |
| H | -1.565601 | 2.091547  | -0.000005 |
| N | 3.749130  | -0.007643 | -0.000002 |

2-piperidino-2-fluoro-N-methylpyridinim+, step 1, ts

|   |           |           |           |
|---|-----------|-----------|-----------|
| C | -2.370901 | 1.764495  | 0.562964  |
| C | -1.808832 | 1.936849  | -0.721156 |
| C | -2.409045 | 0.502222  | 1.105890  |
| N | -1.885391 | -0.571300 | 0.430890  |
| H | -2.889883 | 0.274088  | 2.051459  |
| H | -1.855499 | 2.904850  | -1.214014 |
| C | -1.264250 | 0.857078  | -1.384062 |
| H | -0.875972 | 0.926258  | -2.395234 |
| C | -1.176171 | -0.385731 | -0.715808 |
| N | 0.834823  | -0.553931 | -0.121686 |
| F | -1.051907 | -1.507593 | -1.470692 |
| C | 1.078161  | 0.162471  | 1.147801  |
| C | 1.699787  | -0.052819 | -1.211713 |
| H | 1.018364  | -1.557365 | 0.001534  |
| H | 0.420988  | -0.263019 | 1.915703  |
| H | 0.772062  | 1.205071  | 0.983755  |
| C | 2.543022  | 0.100161  | 1.574712  |
| C | 3.180640  | -0.121761 | -0.845540 |
| H | 1.407448  | 0.990268  | -1.394565 |
| H | 1.478622  | -0.635015 | -2.113309 |
| H | 2.674849  | 0.680484  | 2.495716  |
| C | 3.450273  | 0.623507  | 0.461283  |
| H | 2.805822  | -0.939925 | 1.814378  |
| H | 3.772346  | 0.299372  | -1.666879 |
| H | 3.480339  | -1.174442 | -0.746825 |
| H | 4.501808  | 0.517828  | 0.748531  |
| H | 3.270078  | 1.697926  | 0.315709  |
| H | -2.814095 | 2.591461  | 1.107664  |
| C | -1.978763 | -1.934041 | 0.989498  |
| H | -2.547695 | -1.882222 | 1.916549  |
| H | -0.976516 | -2.319625 | 1.190974  |
| H | -2.485445 | -2.585625 | 0.277439  |

2-piperidino-2-chloro-N-methylpyridinium+, step 1, ts

|   |          |           |           |
|---|----------|-----------|-----------|
| C | 2.174646 | -2.024458 | -0.778566 |
| C | 1.654033 | -1.235105 | -1.835314 |

|    |           |           |           |
|----|-----------|-----------|-----------|
| C  | 2.198572  | -1.481621 | 0.475996  |
| N  | 1.691076  | -0.224900 | 0.737822  |
| H  | 2.654800  | -1.980164 | 1.325219  |
| H  | 1.729870  | -1.577868 | -2.864733 |
| C  | 1.130376  | 0.005713  | -1.576056 |
| H  | 0.809208  | 0.659950  | -2.380397 |
| C  | 0.996179  | 0.487174  | -0.223452 |
| N  | -0.827985 | 0.354764  | 0.233879  |
| Cl | 1.143283  | 2.254555  | -0.074517 |
| C  | -1.141651 | -1.022566 | 0.689542  |
| C  | -1.694797 | 0.767966  | -0.900366 |
| H  | -0.961623 | 1.020580  | 1.008452  |
| H  | -0.474555 | -1.268795 | 1.521227  |
| H  | -0.905304 | -1.688780 | -0.150339 |
| C  | -2.607644 | -1.146738 | 1.096448  |
| C  | -3.169919 | 0.685826  | -0.518971 |
| H  | -1.473628 | 0.081769  | -1.726651 |
| H  | -1.406441 | 1.781179  | -1.196489 |
| H  | -2.800045 | -2.183789 | 1.394947  |
| C  | -3.530358 | -0.719953 | -0.043436 |
| H  | -2.791652 | -0.524002 | 1.983501  |
| H  | -3.769583 | 0.974234  | -1.389974 |
| H  | -3.385592 | 1.420827  | 0.269146  |
| H  | -4.574950 | -0.754187 | 0.283023  |
| H  | -3.436734 | -1.427417 | -0.878751 |
| H  | 2.604336  | -3.005574 | -0.948398 |
| C  | 1.837421  | 0.327390  | 2.097283  |
| H  | 2.182995  | -0.470137 | 2.754467  |
| H  | 0.878117  | 0.700400  | 2.465199  |
| H  | 2.562180  | 1.143520  | 2.096783  |

2-piperidino-2-bromo-N-methylpyridinium+, step 1, ts,

|    |           |           |           |
|----|-----------|-----------|-----------|
| C  | -1.417980 | 2.762434  | -0.822347 |
| C  | -1.106207 | 1.851876  | -1.859392 |
| C  | -1.568407 | 2.268795  | 0.447052  |
| N  | -1.375881 | 0.935257  | 0.735396  |
| H  | -1.884087 | 2.882256  | 1.284938  |
| H  | -1.092435 | 2.182441  | -2.895551 |
| C  | -0.896273 | 0.524685  | -1.569360 |
| H  | -0.733851 | -0.203245 | -2.357700 |
| C  | -0.887077 | 0.064819  | -0.212583 |
| N  | 0.994381  | -0.249825 | 0.261639  |
| Br | -1.469242 | -1.785657 | -0.021993 |
| C  | 1.616204  | 1.014030  | 0.717221  |
| C  | 1.718398  | -0.836373 | -0.889721 |
| H  | 0.970952  | -0.937536 | 1.027142  |
| H  | 1.037053  | 1.398194  | 1.563555  |
| H  | 1.521042  | 1.725078  | -0.114438 |



|   |           |           |           |
|---|-----------|-----------|-----------|
| C | 3.082705  | 0.808592  | 1.092078  |
| C | 3.184702  | -1.089114 | -0.548782 |
| H | 1.637603  | -0.113862 | -1.711829 |
| H | 1.204723  | -1.758080 | -1.181245 |
| H | 3.509474  | 1.774228  | 1.387642  |
| C | 3.860342  | 0.195161  | -0.071399 |
| H | 3.142609  | 0.153397  | 1.972611  |
| H | 3.686650  | -1.491686 | -1.436294 |
| H | 3.249117  | -1.863264 | 0.228577  |
| H | 4.892857  | -0.009137 | 0.230825  |
| H | 3.910682  | 0.914681  | -0.900328 |
| H | -1.601307 | 3.814321  | -1.013483 |
| C | -1.632115 | 0.464430  | 2.109790  |
| H | -1.710858 | 1.334155  | 2.761902  |
| H | -0.810624 | -0.169930 | 2.449620  |
| H | -2.561385 | -0.108055 | 2.139240  |

2-piperidino-2-cyano-N-methylpyridinium+, step 1, ts  
NA

4-piperidino-4-fluoro-N-methylpyridinium+, step 1, ts

|   |           |           |           |
|---|-----------|-----------|-----------|
| N | -2.584962 | -0.752139 | 0.226752  |
| C | -2.014020 | -0.129104 | 1.293092  |
| C | -2.390869 | -0.268297 | -1.030984 |
| C | -1.588566 | 0.829082  | -1.259056 |
| H | -2.927300 | -0.770514 | -1.830232 |
| H | -2.264816 | -0.522225 | 2.273661  |
| C | -1.204478 | 0.975392  | 1.127797  |
| H | -0.788853 | 1.485683  | 1.990736  |
| C | -0.896988 | 1.398296  | -0.176482 |
| N | 1.205153  | 0.520318  | -0.465848 |
| F | -0.348747 | 2.619277  | -0.335859 |
| C | 1.129260  | -0.916540 | -0.759511 |
| C | 2.012789  | 0.799608  | 0.733041  |
| H | 1.600341  | 1.023785  | -1.267630 |
| H | 0.549592  | -1.048833 | -1.681805 |
| H | 0.560168  | -1.377364 | 0.063993  |
| C | 2.500696  | -1.581988 | -0.871686 |
| C | 3.412044  | 0.188706  | 0.661973  |
| H | 1.470381  | 0.372982  | 1.590569  |
| H | 2.055253  | 1.886241  | 0.868228  |
| H | 2.373892  | -2.659327 | -1.035148 |
| C | 3.330595  | -1.312158 | 0.383780  |
| H | 3.020156  | -1.184272 | -1.754557 |
| H | 3.943613  | 0.384625  | 1.601046  |
| H | 3.980703  | 0.686220  | -0.135758 |
| H | 4.335284  | -1.734446 | 0.272853  |
| H | 2.869779  | -1.819608 | 1.243727  |

H -1.461766 1.216809 -2.265311  
C -3.511934 -1.884527 0.443872  
H -3.463801 -2.547657 -0.419429  
H -4.527897 -1.505151 0.572014  
H -3.198519 -2.428519 1.334433

4-piperidino-4-chloro-N-methylpyridinium+, step 1, ts

N -2.502159 -1.079644 0.201747  
C -1.955350 -0.485910 1.298620  
C -2.307652 -0.527107 -1.027980  
C -1.529482 0.596623 -1.193952  
H -2.835374 -0.992090 -1.855566  
H -2.215899 -0.916937 2.260968  
C -1.174249 0.643618 1.188904  
H -0.812094 1.124781 2.092252  
C -0.829390 1.148019 -0.091066  
N 1.200901 0.372828 -0.375358  
Cl -0.331563 2.812327 -0.197232  
C 1.135908 -1.009468 -0.864587  
C 1.957246 0.485814 0.881381  
H 1.607079 0.990581 -1.087889  
H 0.583775 -1.014606 -1.811780  
H 0.547937 -1.576496 -0.125678  
C 2.518330 -1.642032 -1.026162  
C 3.364370 -0.101320 0.768475  
H 1.386769 -0.064448 1.644273  
H 1.984534 1.541980 1.171475  
H 2.404658 -2.685551 -1.344206  
C 3.306676 -1.548060 0.279949  
H 3.059064 -1.121222 -1.828415  
H 3.861194 -0.035325 1.743828  
H 3.953173 0.507921 0.069084  
H 4.318765 -1.943394 0.141232  
H 2.826072 -2.174859 1.044796  
H -1.433849 1.031893 -2.184706  
C -3.417683 -2.227842 0.360418  
H -3.362060 -2.847929 -0.534092  
H -4.438839 -1.867547 0.504484  
H -3.101870 -2.812618 1.224162

4-piperidino-4-bromo-N-methylpyridinium+, step 1, ts

N -2.260207 -1.806592 0.188031  
C -1.796723 -1.178241 1.303048  
C -2.135010 -1.207865 -1.029384  
C -1.514163 0.015307 -1.164635  
H -2.590486 -1.723198 -1.870095  
H -1.995723 -1.667309 2.252206  
C -1.171205 0.048408 1.223333

H -0.869148 0.547915 2.138598  
C -0.909736 0.625151 -0.040870  
N 1.256925 0.129138 -0.354909  
Br -0.591939 2.502844 -0.096588  
C 1.374843 -1.218145 -0.922719  
C 1.966906 0.259107 0.925030  
H 1.593008 0.835942 -1.018642  
H 0.847839 -1.235884 -1.884419  
H 0.845083 -1.896711 -0.234910  
C 2.827497 -1.669707 -1.079568  
C 3.437735 -0.145566 0.823958  
H 1.451978 -0.398543 1.641867  
H 1.858824 1.292453 1.273591  
H 2.850376 -2.699288 -1.457287  
C 3.570109 -1.556541 0.251863  
H 3.317302 -1.041226 -1.836052  
H 3.900391 -0.079549 1.816084  
H 3.963635 0.571341 0.178582  
H 4.626128 -1.816200 0.119946  
H 3.154914 -2.282200 0.966114  
H -1.469937 0.481339 -2.144871  
C -3.012751 -3.072415 0.308847  
H -2.819380 -3.682791 -0.573188  
H -4.080626 -2.858089 0.391308  
H -2.668346 -3.602309 1.196473

4-piperidino-4-cyano-N-methylpyridinium+, step 1, ts

N -2.689643 -0.738726 0.166864  
C -2.057723 -0.237415 1.270177  
C -2.393096 -0.199620 -1.052829  
C -1.397943 0.726921 -1.218597  
H -3.021768 -0.512821 -1.881967  
H -2.431594 -0.578024 2.232016  
C -1.056523 0.693452 1.180284  
H -0.663055 1.127314 2.094870  
C -0.536500 1.105151 -0.111972  
N 1.093659 0.258222 -0.365146  
C 0.883849 -1.197968 -0.550379  
C 2.053243 0.550602 0.734911  
H 1.441601 0.673547 -1.243741  
H 0.173132 -1.330871 -1.372111  
H 0.422488 -1.561995 0.377049  
C 2.205236 -1.912231 -0.822449  
C 3.394497 -0.131584 0.480054  
H 1.593822 0.169360 1.655164  
H 2.159008 1.636731 0.814270  
H 2.004376 -2.985647 -0.918132  
C 3.215733 -1.635944 0.289037

|   |           |           |           |
|---|-----------|-----------|-----------|
| H | 2.606468  | -1.579519 | -1.789914 |
| H | 4.056971  | 0.084611  | 1.326065  |
| H | 3.864855  | 0.311947  | -0.408415 |
| H | 4.176369  | -2.104474 | 0.051259  |
| H | 2.866618  | -2.089099 | 1.227087  |
| H | -1.258249 | 1.176505  | -2.198507 |
| C | -3.848669 | -1.636467 | 0.320597  |
| H | -3.943963 | -2.245473 | -0.578559 |
| H | -4.760586 | -1.053767 | 0.474506  |
| H | -3.676808 | -2.290906 | 1.175436  |
| C | -0.026318 | 2.468935  | -0.175622 |
| N | 0.421068  | 3.564731  | -0.243953 |

2-piperidino-2-fluoro-N-methylpyridinium+, step 1, addition product

|   |           |           |           |
|---|-----------|-----------|-----------|
| C | -2.823554 | -1.122463 | -0.939066 |
| C | -2.121630 | -1.896758 | 0.031405  |
| C | -2.586342 | 0.218006  | -0.969982 |
| N | -1.648734 | 0.819831  | -0.148577 |
| H | -3.131475 | 0.903157  | -1.612240 |
| H | -2.368318 | -2.946810 | 0.170314  |
| C | -1.173804 | -1.327537 | 0.831542  |
| H | -0.694366 | -1.883633 | 1.631305  |
| C | -0.819516 | 0.082387  | 0.698423  |
| N | 0.712822  | 0.275497  | 0.253605  |
| F | -0.722845 | 0.716597  | 1.967004  |
| C | 0.918015  | -0.130413 | -1.177607 |
| C | 1.700402  | -0.417197 | 1.158484  |
| H | 0.889723  | 1.289525  | 0.338145  |
| H | 0.156969  | 0.373826  | -1.778857 |
| H | 0.729600  | -1.209227 | -1.216945 |
| C | 2.331424  | 0.219403  | -1.623172 |
| C | 3.118829  | -0.054430 | 0.740627  |
| H | 1.520372  | -1.490922 | 1.047523  |
| H | 1.473717  | -0.114851 | 2.182633  |
| H | 2.450358  | -0.107617 | -2.662096 |
| C | 3.377327  | -0.427841 | -0.717430 |
| H | 2.455375  | 1.312171  | -1.624919 |
| H | 3.811848  | -0.574699 | 1.411192  |
| H | 3.285251  | 1.021126  | 0.896629  |
| H | 4.382048  | -0.113393 | -1.016963 |
| H | 3.339948  | -1.519530 | -0.831271 |
| H | -3.578015 | -1.555871 | -1.585356 |
| C | -1.474210 | 2.280850  | -0.215732 |
| H | -2.429849 | 2.730304  | -0.487481 |
| H | -0.728679 | 2.562114  | -0.969509 |
| H | -1.189161 | 2.663628  | 0.764722  |

4-piperidino-4-chloro-N-methylpyridinium+, addition product, MP2/6-31+G\*

|    |           |           |           |
|----|-----------|-----------|-----------|
| N  | -2.838738 | -0.767680 | 0.182012  |
| C  | -2.144420 | -0.304978 | 1.265765  |
| C  | -2.376090 | -0.430802 | -1.062060 |
| C  | -1.217715 | 0.259955  | -1.256598 |
| H  | -2.989889 | -0.744397 | -1.902085 |
| H  | -2.578993 | -0.521099 | 2.238020  |
| C  | -0.977898 | 0.395409  | 1.161178  |
| H  | -0.535088 | 0.788865  | 2.070893  |
| C  | -0.398249 | 0.740014  | -0.138770 |
| N  | 1.081922  | 0.181450  | -0.276630 |
| Cl | -0.112814 | 2.555977  | -0.316221 |
| C  | 1.101513  | -1.310710 | -0.478349 |
| C  | 2.001251  | 0.556537  | 0.859652  |
| H  | 1.453284  | 0.627246  | -1.132771 |
| H  | 0.401887  | -1.540969 | -1.284521 |
| H  | 0.716958  | -1.747364 | 0.450480  |
| C  | 2.515121  | -1.779685 | -0.796930 |
| C  | 3.425712  | 0.128543  | 0.537154  |
| H  | 1.624080  | 0.031671  | 1.742386  |
| H  | 1.918221  | 1.633225  | 1.014396  |
| H  | 2.486164  | -2.867910 | -0.923035 |
| C  | 3.504933  | -1.375787 | 0.292522  |
| H  | 2.826965  | -1.363517 | -1.765637 |
| H  | 4.064059  | 0.428232  | 1.375870  |
| H  | 3.786828  | 0.682086  | -0.341314 |
| H  | 4.521582  | -1.662954 | 0.005695  |
| H  | 3.273319  | -1.913270 | 1.221815  |
| H  | -0.940131 | 0.533983  | -2.272160 |
| C  | -4.160954 | -1.388002 | 0.346109  |
| H  | -4.334303 | -2.075879 | -0.482412 |
| H  | -4.945867 | -0.626943 | 0.364911  |
| H  | -4.172757 | -1.951961 | 1.279527  |

2-chloro-N-methylpyridinium+, step 1, addition product

|    |           |           |           |
|----|-----------|-----------|-----------|
| C  | 2.801325  | -1.486481 | -0.858284 |
| C  | 2.064118  | -0.792578 | -1.860862 |
| C  | 2.519779  | -1.199964 | 0.441112  |
| N  | 1.503714  | -0.331824 | 0.812225  |
| H  | 3.057157  | -1.644737 | 1.272898  |
| H  | 2.290132  | -0.949423 | -2.913087 |
| C  | 1.089787  | 0.099679  | -1.521913 |
| H  | 0.605680  | 0.700573  | -2.284924 |
| C  | 0.769062  | 0.404802  | -0.127469 |
| N  | -0.788792 | 0.188846  | 0.156202  |
| Cl | 0.908964  | 2.251938  | 0.187420  |
| C  | -1.115010 | -1.270816 | 0.334771  |
| C  | -1.699501 | 0.795778  | -0.884829 |
| H  | -0.990521 | 0.683820  | 1.039613  |

|   |           |           |           |
|---|-----------|-----------|-----------|
| H | -0.412907 | -1.683718 | 1.061733  |
| H | -0.925077 | -1.744919 | -0.635147 |
| C | -2.561356 | -1.427227 | 0.786029  |
| C | -3.145200 | 0.683987  | -0.422414 |
| H | -1.538392 | 0.226738  | -1.804698 |
| H | -1.390385 | 1.831698  | -1.035290 |
| H | -2.765262 | -2.498623 | 0.892737  |
| C | -3.534314 | -0.773813 | -0.192068 |
| H | -2.678784 | -0.988121 | 1.787656  |
| H | -3.777707 | 1.147022  | -1.188089 |
| H | -3.287531 | 1.272756  | 0.495263  |
| H | -4.557191 | -0.839599 | 0.192079  |
| H | -3.518642 | -1.314926 | -1.147522 |
| H | 3.590044  | -2.188734 | -1.102454 |
| C | 1.419628  | 0.030085  | 2.237977  |
| H | 1.809887  | -0.802902 | 2.823671  |
| H | 0.383623  | 0.196655  | 2.545018  |
| H | 1.999127  | 0.933629  | 2.443115  |

4-piperidino-4-chloro-N-methylpyridinium+, addition product, MP2/6-31+G\*

|    |           |           |           |
|----|-----------|-----------|-----------|
| N  | -2.838738 | -0.767680 | 0.182012  |
| C  | -2.144420 | -0.304978 | 1.265765  |
| C  | -2.376090 | -0.430802 | -1.062060 |
| C  | -1.217715 | 0.259955  | -1.256598 |
| H  | -2.989889 | -0.744397 | -1.902085 |
| H  | -2.578993 | -0.521099 | 2.238020  |
| C  | -0.977898 | 0.395409  | 1.161178  |
| H  | -0.535088 | 0.788865  | 2.070893  |
| C  | -0.398249 | 0.740014  | -0.138770 |
| N  | 1.081922  | 0.181450  | -0.276630 |
| Cl | -0.112814 | 2.555977  | -0.316221 |
| C  | 1.101513  | -1.310710 | -0.478349 |
| C  | 2.001251  | 0.556537  | 0.859652  |
| H  | 1.453284  | 0.627246  | -1.132771 |
| H  | 0.401887  | -1.540969 | -1.284521 |
| H  | 0.716958  | -1.747364 | 0.450480  |
| C  | 2.515121  | -1.779685 | -0.796930 |
| C  | 3.425712  | 0.128543  | 0.537154  |
| H  | 1.624080  | 0.031671  | 1.742386  |
| H  | 1.918221  | 1.633225  | 1.014396  |
| H  | 2.486164  | -2.867910 | -0.923035 |
| C  | 3.504933  | -1.375787 | 0.292522  |
| H  | 2.826965  | -1.363517 | -1.765637 |
| H  | 4.064059  | 0.428232  | 1.375870  |
| H  | 3.786828  | 0.682086  | -0.341314 |
| H  | 4.521582  | -1.662954 | 0.005695  |
| H  | 3.273319  | -1.913270 | 1.221815  |
| H  | -0.940131 | 0.533983  | -2.272160 |

C -4.160954 -1.388002 0.346109  
H -4.334303 -2.075879 -0.482412  
H -4.945867 -0.626943 0.364911  
H -4.172757 -1.951961 1.279527

2-bromo-N-methylpyridinium+, step 1, addition product

C 2.826149 -1.829771 -0.761922  
C 2.056108 -1.294061 -1.821861  
C 2.383720 -1.646592 0.520173  
N 1.199606 -0.992201 0.796474  
H 2.907316 -2.039713 1.385371  
H 2.349750 -1.457538 -2.855616  
C 0.947033 -0.538476 -1.541877  
H 0.404352 -0.057140 -2.347738  
C 0.567289 -0.254529 -0.189731  
N -0.934486 -0.159493 0.049012  
Br 1.022883 1.949144 0.186880  
C -1.584118 -1.518598 0.221696  
C -1.701528 0.614942 -1.007898  
H -1.045772 0.391990 0.916156  
H -0.969579 -2.108675 0.903910  
H -1.551430 -1.996284 -0.763339  
C -3.005569 -1.325350 0.730640  
C -3.114865 0.856613 -0.502599  
H -1.708817 -0.006851 -1.907347  
H -1.154024 1.539304 -1.194849  
H -3.455825 -2.316305 0.857944  
C -3.832742 -0.461770 -0.220308  
H -2.973708 -0.868249 1.730926  
H -3.644525 1.439619 -1.264167  
H -3.081739 1.485903 0.398457  
H -4.822395 -0.273425 0.207552  
H -3.992580 -1.002616 -1.162484  
H 3.740166 -2.386740 -0.937867  
C 0.920358 -0.700013 2.216661  
H 1.447485 -1.435715 2.823715  
H -0.144550 -0.790794 2.441896  
H 1.268098 0.310673 2.450431

2-cyano-N-methylpyridinium+, step 1, addition product

C 2.230876 -2.107505 -0.541285  
C 1.844734 -1.448875 -1.711823  
C 2.265852 -1.405797 0.657225  
N 1.946147 -0.090625 0.703253  
H 2.564235 -1.860357 1.596340  
H 1.822298 -1.976644 -2.661932  
C 1.513179 -0.096861 -1.652555  
H 1.225816 0.462905 -2.538362

|   |           |           |           |
|---|-----------|-----------|-----------|
| C | 1.540946  | 0.567073  | -0.421265 |
| N | -1.076368 | 0.561670  | 0.577521  |
| C | -1.328062 | -0.858786 | 0.886758  |
| C | -1.782063 | 0.969118  | -0.654705 |
| H | -1.449045 | 1.131688  | 1.345130  |
| H | -0.822859 | -1.100258 | 1.832153  |
| H | -0.844372 | -1.449546 | 0.092786  |
| C | -2.809509 | -1.226735 | 0.956318  |
| C | -3.277634 | 0.659361  | -0.635255 |
| H | -1.309945 | 0.428887  | -1.490499 |
| H | -1.602312 | 2.039163  | -0.809283 |
| H | -2.916627 | -2.303007 | 1.141318  |
| C | -3.520034 | -0.819730 | -0.334764 |
| H | -3.267266 | -0.709158 | 1.811155  |
| H | -3.725288 | 0.942105  | -1.595955 |
| H | -3.760723 | 1.278330  | 0.133987  |
| H | -4.593658 | -1.025002 | -0.260645 |
| H | -3.140979 | -1.429595 | -1.168170 |
| H | 2.504594  | -3.158434 | -0.543415 |
| C | 1.951946  | 0.633634  | 1.995471  |
| H | 2.290001  | -0.050801 | 2.772012  |
| H | 0.931780  | 0.971691  | 2.186454  |
| H | 2.629585  | 1.485983  | 1.924266  |
| C | 1.286413  | 1.969880  | -0.323783 |
| N | 1.125207  | 3.145154  | -0.293539 |

2-piperidino-2-cyano-N-methylpyridinium+, C2-Npip bond constrained to 1.63 Å

|   |           |           |           |
|---|-----------|-----------|-----------|
| C | 2.253238  | -1.923228 | -0.671454 |
| C | 1.723317  | -1.192607 | -1.778614 |
| C | 2.270496  | -1.305779 | 0.543293  |
| N | 1.713205  | -0.055350 | 0.746541  |
| H | 2.765748  | -1.731070 | 1.411408  |
| H | 1.876065  | -1.556823 | -2.792436 |
| C | 1.104854  | 0.008283  | -1.594272 |
| H | 0.811935  | 0.632670  | -2.433413 |
| C | 0.863674  | 0.531902  | -0.226160 |
| N | -0.693974 | 0.295501  | 0.191866  |
| C | -0.988454 | -1.141435 | 0.523816  |
| C | -1.651769 | 0.812844  | -0.850957 |
| H | -0.846874 | 0.853563  | 1.048702  |
| H | -0.264358 | -1.461210 | 1.276254  |
| H | -0.814545 | -1.708924 | -0.397088 |
| C | -2.420954 | -1.282367 | 1.023396  |
| C | -3.085015 | 0.700394  | -0.350418 |
| H | -1.493187 | 0.196771  | -1.741666 |
| H | -1.375484 | 1.847621  | -1.074586 |
| H | -2.599415 | -2.342920 | 1.233941  |
| C | -3.426288 | -0.743335 | 0.009091  |



|   |           |           |           |
|---|-----------|-----------|-----------|
| H | -2.528453 | -0.753189 | 1.981441  |
| H | -3.746476 | 1.080871  | -1.136834 |
| H | -3.226115 | 1.357509  | 0.519552  |
| H | -4.441087 | -0.803642 | 0.414897  |
| H | -3.409273 | -1.364345 | -0.896542 |
| H | 2.735178  | -2.886297 | -0.795490 |
| C | 1.845179  | 0.594120  | 2.058952  |
| H | 2.603283  | 0.059704  | 2.631721  |
| H | 0.903678  | 0.569750  | 2.622451  |
| H | 2.169387  | 1.630583  | 1.937545  |
| C | 0.959076  | 2.004629  | -0.195987 |
| N | 1.008752  | 3.188258  | -0.188974 |

4-piperidino-4-cyano-N-methylpyridinium+, ion-dipole addition product MP2/6-31+G\*

|   |           |           |           |
|---|-----------|-----------|-----------|
| N | -2.626110 | -0.954521 | 0.194050  |
| C | -2.069185 | -0.399171 | 1.300400  |
| C | -2.458126 | -0.384150 | -1.028348 |
| C | -1.709814 | 0.769455  | -1.175052 |
| H | -2.957716 | -0.868545 | -1.861885 |
| H | -2.272460 | -0.892328 | 2.246186  |
| C | -1.313730 | 0.757473  | 1.209417  |
| H | -0.898794 | 1.195869  | 2.112316  |
| C | -1.075005 | 1.333022  | -0.052386 |
| N | 1.354644  | 0.472105  | -0.479028 |
| C | 1.204828  | -0.914289 | -0.934544 |
| C | 2.076067  | 0.557066  | 0.799545  |
| H | 1.856668  | 1.019024  | -1.186026 |
| H | 0.709329  | -0.904131 | -1.914351 |
| H | 0.524289  | -1.412187 | -0.222356 |
| C | 2.522071  | -1.689209 | -0.997435 |
| C | 3.422347  | -0.167283 | 0.788577  |
| H | 1.427671  | 0.102186  | 1.566123  |
| H | 2.197010  | 1.617156  | 1.051815  |
| H | 2.327421  | -2.729852 | -1.286373 |
| C | 3.246011  | -1.620279 | 0.347513  |
| H | 3.154500  | -1.252453 | -1.782651 |
| H | 3.878602  | -0.112980 | 1.784640  |
| H | 4.101069  | 0.351768  | 0.097830  |
| H | 4.218264  | -2.121174 | 0.282363  |
| H | 2.663116  | -2.164558 | 1.105447  |
| H | -1.597018 | 1.211156  | -2.161149 |
| C | -3.484489 | -2.156072 | 0.326112  |
| H | -3.376495 | -2.763032 | -0.572237 |
| H | -4.522711 | -1.841448 | 0.449528  |
| H | -3.156613 | -2.726201 | 1.194504  |
| C | -0.400274 | 2.592917  | -0.151711 |
| N | 0.122847  | 3.655968  | -0.214486 |

4-cyano-N-methylpyridinium+ + piperidine, step 1, covalent addition product

|   |           |           |           |
|---|-----------|-----------|-----------|
| N | -2.684272 | -0.725924 | 0.145819  |
| C | -2.057542 | -0.221070 | 1.256392  |
| C | -2.360273 | -0.181306 | -1.069376 |
| C | -1.320647 | 0.685902  | -1.234598 |
| H | -3.005150 | -0.450961 | -1.901751 |
| H | -2.473725 | -0.520273 | 2.214937  |
| C | -1.009920 | 0.649492  | 1.184896  |
| H | -0.631727 | 1.091594  | 2.101967  |
| C | -0.419305 | 1.025484  | -0.114559 |
| N | 1.029651  | 0.226913  | -0.330617 |
| C | 0.834747  | -1.256432 | -0.403939 |
| C | 2.065401  | 0.585336  | 0.697645  |
| H | 1.362187  | 0.554321  | -1.253809 |
| H | 0.061682  | -1.445964 | -1.153090 |
| H | 0.461250  | -1.562873 | 0.579541  |
| C | 2.148129  | -1.948614 | -0.747222 |
| C | 3.393017  | -0.084427 | 0.365605  |
| H | 1.673933  | 0.237139  | 1.659660  |
| H | 2.153614  | 1.674683  | 0.719822  |
| H | 1.963427  | -3.028571 | -0.774166 |
| C | 3.238639  | -1.599589 | 0.262770  |
| H | 2.461735  | -1.660617 | -1.760691 |
| H | 4.113426  | 0.189508  | 1.144608  |
| H | 3.783226  | 0.325299  | -0.576719 |
| H | 4.188210  | -2.058018 | -0.031433 |
| H | 2.978323  | -2.013244 | 1.246425  |
| H | -1.169618 | 1.150056  | -2.206188 |
| C | -3.909047 | -1.529132 | 0.292895  |
| H | -4.040296 | -2.138372 | -0.601898 |
| H | -4.780130 | -0.882661 | 0.432416  |
| H | -3.796725 | -2.189513 | 1.153389  |
| C | 0.011336  | 2.428903  | -0.168040 |
| N | 0.370212  | 3.556324  | -0.233463 |

2-piperidino-2-fluoro-N-methyl-dihydropyridine

|   |           |           |           |
|---|-----------|-----------|-----------|
| C | -3.237420 | -0.223167 | -0.916435 |
| C | -2.441200 | -1.409331 | -0.960089 |
| C | -2.713990 | 0.868221  | -0.285220 |
| N | -1.462101 | 0.868308  | 0.277423  |
| H | -3.242987 | 1.815969  | -0.228938 |
| H | -2.796647 | -2.282008 | -1.505464 |
| C | -1.224121 | -1.449317 | -0.349339 |
| H | -0.611716 | -2.346510 | -0.377303 |
| C | -0.695165 | -0.316981 | 0.440322  |
| N | 0.713679  | 0.006319  | 0.259832  |
| C | 1.001947  | 0.372553  | -1.135368 |

|   |           |           |           |
|---|-----------|-----------|-----------|
| C | 1.653286  | -1.025671 | 0.721034  |
| H | 0.235452  | 1.075625  | -1.479467 |
| H | 0.946054  | -0.514784 | -1.796546 |
| C | 2.391016  | 0.994572  | -1.220366 |
| C | 3.067676  | -0.454596 | 0.705685  |
| H | 1.618493  | -1.922097 | 0.070185  |
| H | 1.368251  | -1.327114 | 1.729826  |
| H | 2.601643  | 1.273930  | -2.260924 |
| C | 3.446823  | 0.024058  | -0.694127 |
| H | 2.401324  | 1.915670  | -0.622213 |
| H | 3.770314  | -1.220881 | 1.058125  |
| H | 3.111901  | 0.383662  | 1.413200  |
| H | 4.437668  | 0.494950  | -0.688875 |
| H | 3.509778  | -0.842100 | -1.369156 |
| H | -4.223564 | -0.171226 | -1.364286 |
| C | -0.969854 | 2.074781  | 0.950917  |
| H | -0.254689 | 2.617280  | 0.324986  |
| H | -0.481509 | 1.795015  | 1.884458  |
| H | -1.824337 | 2.720221  | 1.167648  |
| F | -0.777830 | -0.702080 | 1.860207  |

2-piperidino-2-chloro-N-methyl-dihydropyridine

|   |           |           |           |
|---|-----------|-----------|-----------|
| C | 3.255198  | -0.875368 | -0.538902 |
| C | 2.521237  | -0.567501 | -1.686978 |
| C | 2.599234  | -0.954851 | 0.675980  |
| N | 1.261372  | -0.761779 | 0.766801  |
| H | 3.117080  | -1.149912 | 1.608180  |
| H | 3.011949  | -0.489577 | -2.653920 |
| C | 1.155559  | -0.352693 | -1.575120 |
| H | 0.559018  | -0.092509 | -2.443084 |
| C | 0.521429  | -0.421108 | -0.327948 |
| N | -0.837354 | -0.226280 | -0.116226 |
| C | -1.639442 | -1.461506 | -0.076733 |
| C | -1.454613 | 0.819623  | -0.946328 |
| H | -1.096397 | -2.226084 | 0.491601  |
| H | -1.775862 | -1.854313 | -1.103303 |
| C | -2.991380 | -1.156701 | 0.555458  |
| C | -2.794172 | 1.190847  | -0.325620 |
| H | -1.613952 | 0.460623  | -1.982288 |
| H | -0.766163 | 1.670021  | -0.942571 |
| H | -3.602512 | -2.068463 | 0.566156  |
| C | -3.699102 | -0.035275 | -0.206251 |
| H | -2.829336 | -0.851504 | 1.597669  |
| H | -3.270803 | 1.965828  | -0.938719 |
| H | -2.601477 | 1.626400  | 0.662598  |
| H | -4.640660 | 0.224875  | 0.292279  |
| H | -3.961809 | -0.393897 | -1.212587 |
| H | 4.329409  | -1.026493 | -0.569046 |

|    |           |           |          |
|----|-----------|-----------|----------|
| C  | 0.657345  | -0.579328 | 2.102983 |
| H  | -0.202253 | -1.234601 | 2.231651 |
| H  | 0.373087  | 0.476748  | 2.148908 |
| H  | 1.419486  | -0.812211 | 2.846624 |
| Cl | 1.282077  | 2.297332  | 0.526034 |

2-piperidino-2-chloro-N-methyldihydropyridine, constrained C2-Cl length to 1.900 Å

|    |           |           |           |
|----|-----------|-----------|-----------|
| C  | 3.149197  | -0.838742 | -0.862345 |
| C  | 2.315770  | -0.199958 | -1.834197 |
| C  | 2.620428  | -1.056773 | 0.376055  |
| N  | 1.335769  | -0.689580 | 0.710458  |
| H  | 3.159088  | -1.593678 | 1.152890  |
| H  | 2.640126  | -0.124695 | -2.870505 |
| C  | 1.101916  | 0.293639  | -1.467143 |
| H  | 0.467639  | 0.806216  | -2.184899 |
| C  | 0.635149  | 0.278233  | -0.062280 |
| N  | -0.803136 | 0.083836  | 0.123175  |
| C  | -1.217357 | -1.259069 | -0.328780 |
| C  | -1.667870 | 1.095341  | -0.500733 |
| H  | -0.520372 | -1.998495 | 0.075743  |
| H  | -1.164602 | -1.334106 | -1.433270 |
| C  | -2.636672 | -1.542906 | 0.150308  |
| C  | -3.100317 | 0.904911  | -0.014397 |
| H  | -1.650979 | 1.012634  | -1.605566 |
| H  | -1.302820 | 2.086693  | -0.230618 |
| H  | -2.932999 | -2.546914 | -0.180676 |
| C  | -3.610852 | -0.488813 | -0.369046 |
| H  | -2.642062 | -1.544163 | 1.248710  |
| H  | -3.736556 | 1.679154  | -0.462453 |
| H  | -3.120819 | 1.049664  | 1.073535  |
| H  | -4.615522 | -0.653523 | 0.039671  |
| H  | -3.693024 | -0.578058 | -1.462194 |
| H  | 4.147316  | -1.192287 | -1.097317 |
| C  | 0.957003  | -0.843556 | 2.120597  |
| H  | 1.214584  | -1.856761 | 2.439705  |
| H  | -0.116270 | -0.686349 | 2.217942  |
| H  | 1.484199  | -0.111422 | 2.742654  |
| Cl | 1.022134  | 1.986615  | 0.673705  |

2-piperidino-2-bromo-N-methyldihydropyridine, C2-Br length constrained to 2.100 Å

|   |          |           |           |
|---|----------|-----------|-----------|
| C | 2.758032 | -1.758582 | -0.713044 |
| C | 1.970613 | -1.256546 | -1.794919 |
| C | 2.270181 | -1.610495 | 0.553449  |
| N | 1.056723 | -1.009559 | 0.810278  |
| H | 2.779667 | -2.011750 | 1.425505  |
| H | 2.256914 | -1.457312 | -2.825339 |
| C | 0.872826 | -0.497177 | -1.525750 |
| H | 0.288470 | -0.059678 | -2.330326 |

C 0.458801 -0.168695 -0.153833  
N -0.976842 -0.082879 0.088210  
C -1.604566 -1.415359 -0.046421  
C -1.708462 0.884436 -0.740166  
H -1.007316 -2.145092 0.508296  
H -1.607890 -1.738255 -1.106511  
C -3.029659 -1.365838 0.492200  
C -3.134642 1.023864 -0.221063  
H -1.744180 0.562742 -1.800098  
H -1.192449 1.843411 -0.695201  
H -3.481987 -2.361953 0.399057  
C -3.857871 -0.319542 -0.248920  
H -2.992787 -1.120963 1.562345  
H -3.665164 1.765896 -0.831594  
H -3.095164 1.410309 0.805713  
H -4.859284 -0.234522 0.190887  
H -3.994314 -0.637901 -1.292826  
H 3.692351 -2.286086 -0.873512  
C 0.714900 -0.788227 2.221059  
H 0.958068 -1.696047 2.778005  
H -0.349383 -0.574931 2.305359  
H 1.282729 0.061537 2.617154  
Br 1.197475 1.770303 0.169660

2-piperidino-2-bromo-N-methyl-dihydropyridine

C 2.960234 -1.581550 -0.417795  
C 2.313060 -1.273287 -1.621037  
C 2.241149 -1.530295 0.757331  
N 0.918990 -1.208728 0.770297  
H 2.690321 -1.712099 1.727377  
H 2.855344 -1.289676 -2.562995  
C 0.980558 -0.907073 -1.592770  
H 0.455065 -0.660476 -2.508978  
C 0.260080 -0.887294 -0.384193  
N -1.062776 -0.542641 -0.293939  
C -2.048078 -1.538016 0.145085  
C -1.586431 0.406560 -1.281353  
H -1.570030 -2.257276 0.816255  
H -2.403215 -2.104480 -0.736067  
C -3.217745 -0.829951 0.816608  
C -2.728895 1.174328 -0.628445  
H -1.943380 -0.127286 -2.182982  
H -0.774258 1.089670 -1.543553  
H -3.976634 -1.569657 1.103126  
C -3.812231 0.221969 -0.122052  
H -2.859670 -0.347855 1.735541  
H -3.146509 1.882805 -1.354949  
H -2.303908 1.759374 0.196380

|    |           |           |           |
|----|-----------|-----------|-----------|
| H  | -4.604676 | 0.779781  | 0.390981  |
| H  | -4.284219 | -0.284208 | -0.977441 |
| H  | 4.015506  | -1.831837 | -0.380697 |
| C  | 0.300405  | -0.869247 | 2.066640  |
| H  | -0.299018 | -1.700292 | 2.445179  |
| H  | -0.303726 | 0.023696  | 1.895258  |
| H  | 1.103046  | -0.629612 | 2.762505  |
| Br | 1.268109  | 1.912061  | 0.268927  |

2-piperidino-2-cyano-N-methylpyridine, deprotonated adduct, MP2/6-31+G\*

|   |           |           |           |
|---|-----------|-----------|-----------|
| C | 2.547808  | -1.697200 | -0.570998 |
| C | 1.989664  | -1.018113 | -1.707531 |
| C | 2.334984  | -1.146206 | 0.657378  |
| N | 1.597557  | -0.001760 | 0.855226  |
| H | 2.782784  | -1.555888 | 1.560169  |
| H | 2.240914  | -1.349502 | -2.713990 |
| C | 1.195761  | 0.072010  | -1.547899 |
| H | 0.810203  | 0.619504  | -2.404858 |
| C | 0.730326  | 0.538097  | -0.189173 |
| N | -0.687874 | 0.220756  | 0.129715  |
| C | -0.937792 | -1.228783 | 0.125216  |
| C | -1.662610 | 0.907704  | -0.733197 |
| H | -0.164988 | -1.719537 | 0.724725  |
| H | -0.871026 | -1.641953 | -0.899634 |
| C | -2.318019 | -1.507895 | 0.711171  |
| C | -3.067132 | 0.705918  | -0.175106 |
| H | -1.621883 | 0.521798  | -1.770731 |
| H | -1.420157 | 1.974813  | -0.761228 |
| H | -2.495645 | -2.591172 | 0.713193  |
| C | -3.400683 | -0.781023 | -0.082779 |
| H | -2.332754 | -1.169952 | 1.756113  |
| H | -3.788903 | 1.229777  | -0.815079 |
| H | -3.115102 | 1.164148  | 0.821291  |
| H | -4.385539 | -0.930018 | 0.376903  |
| H | -3.454448 | -1.205467 | -1.096022 |
| H | 3.179176  | -2.572673 | -0.673357 |
| C | 1.305971  | 0.418160  | 2.226187  |
| H | 0.387701  | -0.042368 | 2.607081  |
| H | 1.192587  | 1.504800  | 2.260621  |
| H | 2.152593  | 0.138145  | 2.857650  |
| C | 0.857100  | 2.022988  | -0.139723 |
| N | 1.012062  | 3.196948  | -0.125530 |

4-piperidino-4-cyano-N-methylpyridine, deprotonated adduct, MP2/6-31+G\*

|   |           |           |           |
|---|-----------|-----------|-----------|
| N | -2.655421 | -0.782285 | 0.123728  |
| C | -2.056721 | -0.222239 | 1.241920  |
| C | -2.279285 | -0.260623 | -1.104597 |
| C | -1.207188 | 0.550146  | -1.267166 |

|   |           |           |           |
|---|-----------|-----------|-----------|
| H | -2.898164 | -0.556980 | -1.948378 |
| H | -2.506277 | -0.492260 | 2.195071  |
| C | -0.994593 | 0.616810  | 1.173551  |
| H | -0.595206 | 1.030111  | 2.095986  |
| C | -0.289734 | 0.908482  | -0.128264 |
| N | 1.018315  | 0.202205  | -0.299268 |
| C | 0.869104  | -1.258102 | -0.234982 |
| C | 2.049644  | 0.636227  | 0.656184  |
| H | 0.048073  | -1.553134 | -0.894908 |
| H | 0.610427  | -1.587719 | 0.791351  |
| C | 2.168703  | -1.923928 | -0.674776 |
| C | 3.397350  | 0.046753  | 0.253107  |
| H | 1.802720  | 0.315264  | 1.688119  |
| H | 2.102172  | 1.729590  | 0.647118  |
| H | 2.046183  | -3.014519 | -0.636617 |
| C | 3.329486  | -1.478026 | 0.211576  |
| H | 2.367781  | -1.649399 | -1.718771 |
| H | 4.166497  | 0.384236  | 0.960074  |
| H | 3.663791  | 0.437680  | -0.737210 |
| H | 4.277106  | -1.898931 | -0.147234 |
| H | 3.175976  | -1.862794 | 1.230578  |
| H | -0.951263 | 0.911208  | -2.259588 |
| C | -3.990743 | -1.356644 | 0.261259  |
| H | -4.194532 | -1.993475 | -0.602243 |
| H | -4.763933 | -0.580073 | 0.329095  |
| H | -4.021049 | -1.974892 | 1.161018  |
| C | -0.008359 | 2.360120  | -0.215752 |
| N | 0.171923  | 3.528970  | -0.279577 |

2-piperidino-2-fluoro-N-methyl-dihydropyridine, ts for loss of F-

|   |           |           |           |
|---|-----------|-----------|-----------|
| C | 3.375285  | -0.690777 | -0.021327 |
| C | 2.561321  | -1.528090 | -0.776964 |
| C | 2.774403  | 0.275337  | 0.732874  |
| N | 1.445275  | 0.413704  | 0.789431  |
| H | 3.343563  | 0.973836  | 1.310672  |
| H | 2.993895  | -2.294387 | -1.394175 |
| C | 1.198376  | -1.358192 | -0.738326 |
| H | 0.545595  | -1.970264 | -1.328440 |
| C | 0.642586  | -0.346491 | 0.034552  |
| N | -0.734969 | -0.119409 | 0.121645  |
| C | -1.473839 | -1.195669 | 0.782018  |
| C | -1.352935 | 0.327499  | -1.142846 |
| H | -0.952358 | -1.474759 | 1.691961  |
| H | -1.523743 | -2.087154 | 0.150896  |
| C | -2.885990 | -0.719697 | 1.112090  |
| C | -2.753005 | 0.851184  | -0.850943 |
| H | -1.420035 | -0.511352 | -1.842378 |

|   |           |           |           |
|---|-----------|-----------|-----------|
| H | -0.702140 | 1.082779  | -1.561006 |
| H | -3.441343 | -1.539215 | 1.561254  |
| C | -3.603827 | -0.199910 | -0.135188 |
| H | -2.822969 | 0.072222  | 1.854186  |
| H | -3.221011 | 1.144373  | -1.786578 |
| H | -2.673926 | 1.745887  | -0.239063 |
| H | -4.572744 | 0.209743  | 0.136704  |
| H | -3.795514 | -1.031594 | -0.812242 |
| H | 4.444676  | -0.768709 | -0.037738 |
| C | 0.891186  | 1.591433  | 1.488260  |
| H | 0.049076  | 1.295208  | 2.089249  |
| H | 0.615312  | 2.291009  | 0.714724  |
| H | 1.669226  | 1.994394  | 2.118836  |
| F | 1.138994  | 1.863127  | -1.323288 |

Transition states for loss of Cl<sup>-</sup> and Br<sup>-</sup> from the dihydropyridines did not converge.

2-piperidino-2-cyano-N-methyldihydropyridine, ts for loss of CN<sup>-</sup>

|   |           |           |           |
|---|-----------|-----------|-----------|
| C | -3.180877 | -0.614430 | 0.841692  |
| C | -2.377256 | 0.005787  | 1.818254  |
| C | -2.598282 | -1.024327 | -0.337044 |
| N | -1.272303 | -0.825868 | -0.580868 |
| H | -3.150745 | -1.548136 | -1.109655 |
| H | -2.789445 | 0.264771  | 2.790707  |
| C | -1.064848 | 0.288270  | 1.516466  |
| H | -0.429299 | 0.813068  | 2.223135  |
| C | -0.543839 | 0.032390  | 0.214862  |
| N | 0.846707  | 0.033416  | -0.056773 |
| C | 1.494767  | -1.187022 | 0.468755  |
| C | 1.565779  | 1.233157  | 0.389733  |
| H | 0.893342  | -2.059148 | 0.186505  |
| H | 1.524888  | -1.158677 | 1.576270  |
| C | 2.906482  | -1.292898 | -0.094523 |
| C | 2.973265  | 1.210134  | -0.191662 |
| H | 1.631942  | 1.273694  | 1.495400  |
| H | 0.992166  | 2.094981  | 0.039227  |
| H | 3.386456  | -2.196889 | 0.302496  |
| C | 3.721421  | -0.047026 | 0.248621  |
| H | 2.841261  | -1.404951 | -1.185062 |
| H | 3.509219  | 2.112757  | 0.128127  |
| H | 2.897616  | 1.243080  | -1.286111 |
| H | 4.712063  | -0.096443 | -0.219658 |
| H | 3.885366  | -0.010486 | 1.335702  |
| H | -4.237241 | -0.803377 | 1.002667  |
| C | -0.768895 | -1.070129 | -1.940041 |
| H | 0.183680  | -1.596142 | -1.911945 |
| H | -0.640956 | -0.090223 | -2.414446 |
| H | -1.509169 | -1.666715 | -2.474542 |



C -1.200866 1.829800 -0.847542  
N -2.326154 2.027680 -1.220108

2-piperidino-2-fluoro-N-methylpyridinium+ + piperidine, H-bonded complex

C -0.323595 -2.894382 -0.443985  
C 0.244557 -2.398668 -1.660457  
C 0.322283 -2.592579 0.716974  
N 1.376158 -1.698331 0.780135  
H 0.074785 -3.060285 1.666700  
H -0.081925 -2.804457 -2.615708  
C 1.254094 -1.486452 -1.634729  
H 1.798886 -1.202783 -2.530172  
C 1.724066 -0.917157 -0.355566  
N 1.220860 0.555124 -0.172172  
C 1.591731 1.416902 -1.347029  
C 1.667089 1.174089 1.120044  
N -1.581979 0.654755 -0.000603  
H 1.194114 0.932331 -2.241679  
H 2.685249 1.433613 -1.404122  
C 1.026781 2.823265 -1.197468  
C 1.101043 2.579772 1.281911  
H 2.762328 1.196178 1.112207  
H 1.319338 0.519964 1.923527  
H 1.354881 3.406910 -2.065378  
C 1.484277 3.471807 0.105207  
H -0.069673 2.789010 -1.240690  
H 1.483784 2.984749 2.226012  
H 0.009102 2.532430 1.381796  
H 1.037437 4.465320 0.216697  
H 2.573431 3.613549 0.086467  
H -1.147253 -3.599960 -0.439383  
C 2.350146 -1.897824 1.874992  
H 1.791182 -2.033910 2.803712  
H 3.004154 -1.035037 1.972628  
H 2.962612 -2.782674 1.680689  
C -2.338968 0.131692 -1.165612  
H -1.749073 1.668405 0.030735  
C -2.105494 0.091129 1.268562  
C -3.840127 0.377405 -1.050469  
H -2.130573 -0.943292 -1.220337  
H -1.926613 0.593273 -2.071512  
C -3.600927 0.332587 1.450930  
H -1.531038 0.526395 2.096574  
H -1.892557 -0.984350 1.247404  
H -4.350987 -0.058195 -1.917897  
H -4.033859 1.459762 -1.080101  
C -4.382879 -0.208660 0.253458  
H -3.782887 1.412243 1.555986

H -3.938059 -0.136533 2.383448  
H -5.449382 0.018389 0.359881  
H -4.295312 -1.304324 0.225512  
H 0.134086 0.498088 -0.135164  
F 3.116010 -0.744800 -0.395548

2-piperidino-2-chloro-N-methylpyridinium+ + piperidine, H-bonded complex

C -0.292211 -2.868490 -0.427730  
C 0.264610 -2.324392 -1.627287  
C 0.289339 -2.512300 0.749221  
N 1.280896 -1.547693 0.854794  
H 0.029246 -2.986417 1.691896  
H -0.017225 -2.735116 -2.594754  
C 1.214308 -1.353191 -1.573248  
H 1.740615 -1.035749 -2.468023  
C 1.652867 -0.763205 -0.283044  
N 1.016012 0.677456 -0.127106  
C 1.310756 1.578906 -1.292099  
C 1.329972 1.348275 1.176683  
N -1.786012 0.506772 -0.027513  
H 1.012455 1.045642 -2.197343  
H 2.392556 1.743180 -1.314855  
C 0.570810 2.904806 -1.171340  
C 0.604722 2.683098 1.309389  
H 2.415113 1.493416 1.222176  
H 1.017690 0.662905 1.967618  
H 0.852663 3.518335 -2.034993  
C 0.913430 3.608871 0.137413  
H -0.511667 2.740126 -1.246353  
H 0.915871 3.131840 2.260135  
H -0.476949 2.514985 1.384292  
H 0.351692 4.544359 0.230460  
H 1.978975 3.876028 0.145528  
H -1.063847 -3.630615 -0.442175  
C 2.172870 -1.686895 2.026122  
H 1.557896 -2.002638 2.871271  
H 2.654125 -0.744556 2.278013  
H 2.942921 -2.439578 1.833213  
C -2.486664 -0.063527 -1.205609  
H -2.014321 1.508811 -0.008674  
C -2.311456 -0.073912 1.233278  
C -4.000453 0.109100 -1.128979  
H -2.223710 -1.126792 -1.245080  
H -2.075413 0.410318 -2.105772  
C -3.820634 0.096916 1.377963  
H -1.778378 0.393150 2.071656  
H -2.046976 -1.137628 1.224813  
H -4.468044 -0.358445 -2.004168

|    |           |           |           |
|----|-----------|-----------|-----------|
| H  | -4.246131 | 1.180447  | -1.173938 |
| C  | -4.546132 | -0.491352 | 0.167180  |
| H  | -4.056800 | 1.167479  | 1.468405  |
| H  | -4.157580 | -0.380140 | 2.306535  |
| H  | -5.624673 | -0.315412 | 0.245647  |
| H  | -4.405171 | -1.581684 | 0.151924  |
| H  | -0.059837 | 0.495651  | -0.123462 |
| Cl | 3.446578  | -0.503759 | -0.358982 |

2-piperidino-2-bromo-N-methylpyridinium+ + piperidine, H-bonded complex

|   |           |           |           |
|---|-----------|-----------|-----------|
| C | -0.498646 | -2.987187 | -0.391593 |
| C | 0.010821  | -2.354137 | -1.567364 |
| C | -0.042960 | -2.535151 | 0.806274  |
| N | 0.772095  | -1.417641 | 0.953315  |
| H | -0.286098 | -3.026360 | 1.744865  |
| H | -0.201347 | -2.771249 | -2.549638 |
| C | 0.812881  | -1.259797 | -1.474944 |
| H | 1.296139  | -0.863989 | -2.361539 |
| C | 1.182948  | -0.658512 | -0.176638 |
| N | 0.608993  | 0.793324  | -0.079640 |
| C | 0.982095  | 1.667216  | -1.244523 |
| C | 0.868811  | 1.491862  | 1.222248  |
| N | -2.159432 | 0.580974  | -0.086480 |
| H | 0.723793  | 1.126362  | -2.156148 |
| H | 2.065796  | 1.812710  | -1.211648 |
| C | 0.254783  | 3.003956  | -1.193094 |
| C | 0.162054  | 2.841400  | 1.286498  |
| H | 1.953601  | 1.613532  | 1.322723  |
| H | 0.496135  | 0.837445  | 2.011902  |
| H | 0.586481  | 3.590243  | -2.057852 |
| C | 0.542739  | 3.736034  | 0.112550  |
| H | -0.825600 | 2.850128  | -1.315225 |
| H | 0.431702  | 3.304835  | 2.242826  |
| H | -0.925239 | 2.691805  | 1.308617  |
| H | -0.008368 | 4.681396  | 0.156448  |
| H | 1.610767  | 3.987169  | 0.167414  |
| H | -1.143403 | -3.858255 | -0.435064 |
| C | 1.569869  | -1.435916 | 2.203090  |
| H | 0.886412  | -1.600821 | 3.039638  |
| H | 2.097782  | -0.499198 | 2.349326  |
| H | 2.306900  | -2.243522 | 2.157448  |
| C | -2.780942 | -0.080316 | -1.262166 |
| H | -2.471406 | 1.560348  | -0.095866 |
| C | -2.646213 | -0.019969 | 1.180873  |
| C | -4.305087 | -0.054388 | -1.210311 |
| H | -2.415648 | -1.113740 | -1.272646 |
| H | -2.401846 | 0.412288  | -2.166098 |

|    |           |           |           |
|----|-----------|-----------|-----------|
| C  | -4.167043 | 0.001880  | 1.298246  |
| H  | -2.178076 | 0.518814  | 2.014789  |
| H  | -2.276019 | -1.052091 | 1.202371  |
| H  | -4.710115 | -0.582753 | -2.082015 |
| H  | -4.653428 | 0.986489  | -1.281677 |
| C  | -4.809814 | -0.680524 | 0.090215  |
| H  | -4.509851 | 1.045021  | 1.361965  |
| H  | -4.469994 | -0.487393 | 2.232140  |
| H  | -5.901586 | -0.611202 | 0.149292  |
| H  | -4.560704 | -1.751373 | 0.100477  |
| H  | -0.481271 | 0.639081  | -0.123946 |
| Br | 3.217004  | -0.427172 | -0.229697 |

2-piperidino-2-cyano-N-methylpyridinium<sup>+</sup> + piperidine, H-bonded complex

|   |           |           |           |
|---|-----------|-----------|-----------|
| C | -0.191212 | -2.723857 | -0.362946 |
| C | 0.352650  | -2.270719 | -1.605517 |
| C | 0.511352  | -2.449322 | 0.775831  |
| N | 1.595006  | -1.595418 | 0.790116  |
| H | 0.288515  | -2.922461 | 1.729054  |
| H | 0.008737  | -2.710799 | -2.539720 |
| C | 1.377831  | -1.374225 | -1.626005 |
| H | 1.920694  | -1.135201 | -2.536342 |
| C | 1.820433  | -0.748772 | -0.345541 |
| N | 1.018826  | 0.631180  | -0.121281 |
| C | 1.217591  | 1.561540  | -1.281141 |
| C | 1.381198  | 1.282659  | 1.177457  |
| N | -1.786258 | 0.389147  | 0.043618  |
| H | 0.893181  | 1.029745  | -2.179770 |
| H | 2.292753  | 1.766387  | -1.357187 |
| C | 0.445046  | 2.861283  | -1.092777 |
| C | 0.606942  | 2.579094  | 1.385843  |
| H | 2.459815  | 1.485947  | 1.154913  |
| H | 1.165708  | 0.558581  | 1.968161  |
| H | 0.671737  | 3.507828  | -1.948530 |
| C | 0.820636  | 3.541932  | 0.220846  |
| H | -0.633808 | 2.665128  | -1.128887 |
| H | 0.947379  | 3.021687  | 2.329302  |
| H | -0.460801 | 2.360451  | 1.511438  |
| H | 0.227784  | 4.451590  | 0.363534  |
| H | 1.873820  | 3.852546  | 0.187234  |
| H | -1.030187 | -3.410620 | -0.322547 |
| C | 2.634686  | -1.792558 | 1.818056  |
| H | 2.161479  | -2.268319 | 2.679182  |
| H | 3.061860  | -0.840138 | 2.134786  |
| H | 3.433019  | -2.441648 | 1.445070  |
| C | 3.234746  | -0.357450 | -0.436471 |
| N | 4.369323  | -0.035538 | -0.545212 |
| C | -2.475215 | -0.091216 | -1.180003 |

|   |           |           |           |
|---|-----------|-----------|-----------|
| H | -1.991869 | 1.393428  | 0.117560  |
| C | -2.359342 | -0.246445 | 1.256391  |
| C | -3.985133 | 0.121879  | -1.128862 |
| H | -2.242538 | -1.158099 | -1.276307 |
| H | -2.030317 | 0.420056  | -2.043340 |
| C | -3.865440 | -0.034071 | 1.377108  |
| H | -1.830472 | 0.152840  | 2.131576  |
| H | -2.129149 | -1.315975 | 1.192698  |
| H | -4.444540 | -0.282693 | -2.039026 |
| H | -4.198012 | 1.201109  | -1.120251 |
| C | -4.579825 | -0.530835 | 0.119607  |
| H | -4.069995 | 1.037016  | 1.521944  |
| H | -4.239471 | -0.550127 | 2.269862  |
| H | -5.653915 | -0.324730 | 0.183589  |
| H | -4.472989 | -1.622735 | 0.046781  |
| H | -0.038362 | 0.380120  | -0.076720 |

4-piperidino-4-cyano-N-methylpyridinium+ + piperidine, H-bonded complex, MP2/6-31+G\*

|   |           |           |           |
|---|-----------|-----------|-----------|
| N | 3.718216  | -1.155562 | -0.412188 |
| C | 3.647936  | -0.445858 | 0.763156  |
| C | 2.569249  | -1.778382 | -0.836054 |
| C | 1.347974  | -1.527083 | -0.291137 |
| H | 2.690422  | -2.514587 | -1.626745 |
| H | 4.600235  | -0.161370 | 1.203799  |
| C | 2.472351  | -0.151360 | 1.383078  |
| H | 2.501853  | 0.314775  | 2.363382  |
| C | 1.161766  | -0.492500 | 0.763906  |
| N | 0.456869  | 0.805649  | 0.150748  |
| C | 1.191809  | 1.306981  | -1.050310 |
| C | 0.297580  | 1.890491  | 1.173302  |
| H | -0.540909 | 0.484749  | -0.142620 |
| H | 1.263956  | 0.476786  | -1.757100 |
| H | 2.202831  | 1.575754  | -0.717775 |
| C | 0.475085  | 2.503186  | -1.663827 |
| C | -0.434661 | 3.087859  | 0.580128  |
| H | 1.302954  | 2.179265  | 1.500735  |
| H | -0.245775 | 1.467215  | 2.024337  |
| H | 1.059507  | 2.839578  | -2.528158 |
| C | 0.296961  | 3.625288  | -0.645870 |
| H | -0.503453 | 2.186675  | -2.050037 |
| H | -0.518167 | 3.853151  | 1.360609  |
| H | -1.457989 | 2.798728  | 0.309275  |
| H | -0.258455 | 4.459148  | -1.088024 |
| H | 1.279497  | 4.018471  | -0.350698 |
| H | 0.494118  | -2.109563 | -0.622884 |
| C | 5.023230  | -1.596668 | -0.923632 |
| H | 4.930787  | -1.810253 | -1.989257 |
| H | 5.368433  | -2.491471 | -0.396423 |

|   |           |           |           |
|---|-----------|-----------|-----------|
| H | 5.745527  | -0.790107 | -0.791368 |
| C | 0.190617  | -0.959724 | 1.769319  |
| N | -0.597834 | -1.358172 | 2.559391  |
| N | -2.169137 | -0.001970 | -0.491433 |
| C | -2.269403 | -1.402424 | -0.975284 |
| H | -2.476478 | 0.604458  | -1.262701 |
| C | -3.103477 | 0.224217  | 0.643948  |
| C | -4.548039 | -0.123814 | 0.297607  |
| H | -3.017465 | 1.272634  | 0.952390  |
| H | -2.750945 | -0.395898 | 1.476561  |
| C | -3.691136 | -1.797960 | -1.363834 |
| H | -1.912794 | -2.047613 | -0.161162 |
| H | -1.585055 | -1.516449 | -1.825356 |
| C | -4.651683 | -1.566182 | -0.197652 |
| H | -4.911667 | 0.564093  | -0.479900 |
| H | -5.180511 | 0.032672  | 1.179832  |
| H | -3.704314 | -2.848316 | -1.679873 |
| H | -4.007266 | -1.201332 | -2.232043 |
| H | -5.680006 | -1.794405 | -0.499024 |
| H | -4.402613 | -2.252801 | 0.623536  |

2-fluoro-N-methylpyridinium+ + pip, proton transfer ts

|   |           |           |           |
|---|-----------|-----------|-----------|
| C | -0.326686 | -2.929902 | -0.449421 |
| C | 0.230723  | -2.414813 | -1.665912 |
| C | 0.310053  | -2.610653 | 0.712588  |
| N | 1.321784  | -1.671531 | 0.789987  |
| H | 0.082491  | -3.100601 | 1.656666  |
| H | -0.069405 | -2.841435 | -2.621018 |
| C | 1.200572  | -1.462746 | -1.637082 |
| H | 1.748043  | -1.173971 | -2.529477 |
| C | 1.651317  | -0.867206 | -0.353774 |
| N | 1.136545  | 0.552735  | -0.169423 |
| C | 1.496259  | 1.410954  | -1.344823 |
| C | 1.614524  | 1.173298  | 1.105396  |
| N | -1.483818 | 0.647101  | 0.019754  |
| H | 1.082309  | 0.935534  | -2.237846 |
| H | 2.589696  | 1.432706  | -1.433668 |
| C | 0.947563  | 2.824682  | -1.194025 |
| C | 1.064718  | 2.584592  | 1.282470  |
| H | 2.711636  | 1.199238  | 1.090056  |
| H | 1.282495  | 0.527736  | 1.923295  |
| H | 1.268733  | 3.402808  | -2.068321 |
| C | 1.430486  | 3.473937  | 0.098646  |
| H | -0.150955 | 2.810814  | -1.224088 |
| H | 1.471950  | 2.986575  | 2.217671  |
| H | -0.026055 | 2.556854  | 1.411359  |
| H | 0.995756  | 4.472382  | 0.216375  |

|   |           |           |           |
|---|-----------|-----------|-----------|
| H | 2.520436  | 3.604202  | 0.059764  |
| H | -1.117909 | -3.672045 | -0.448108 |
| C | 2.336202  | -1.893175 | 1.843029  |
| H | 1.807584  | -2.146251 | 2.765021  |
| H | 2.930385  | -0.997379 | 2.006256  |
| H | 3.004550  | -2.713532 | 1.566381  |
| C | -2.228671 | 0.135899  | -1.166075 |
| H | -1.648099 | 1.661368  | 0.068164  |
| C | -1.995019 | 0.053571  | 1.287586  |
| C | -3.724016 | 0.396184  | -1.038836 |
| H | -2.019422 | -0.936929 | -1.226356 |
| H | -1.803718 | 0.612052  | -2.057279 |
| C | -3.486985 | 0.307062  | 1.462672  |
| H | -1.412364 | 0.476407  | 2.114488  |
| H | -1.781293 | -1.019029 | 1.236490  |
| H | -4.237161 | -0.020075 | -1.913641 |
| H | -3.909136 | 1.480341  | -1.051783 |
| C | -4.269950 | -0.209369 | 0.254890  |
| H | -3.661180 | 1.385858  | 1.587583  |
| H | -3.828023 | -0.174821 | 2.386524  |
| H | -5.334186 | 0.025088  | 0.364496  |
| H | -4.190792 | -1.304567 | 0.208233  |
| H | -0.146888 | 0.518304  | -0.096734 |
| F | 3.056932  | -0.724406 | -0.404077 |

2-chloro-N-methylpyridinium+ + piperidine, proton transfer ts

|   |           |           |           |
|---|-----------|-----------|-----------|
| C | -0.311207 | -2.963725 | -0.445222 |
| C | 0.224922  | -2.375913 | -1.636339 |
| C | 0.227649  | -2.570125 | 0.739562  |
| N | 1.140546  | -1.533666 | 0.873149  |
| H | -0.015807 | -3.065440 | 1.676430  |
| H | -0.023041 | -2.793864 | -2.610130 |
| C | 1.107113  | -1.345905 | -1.566570 |
| H | 1.620612  | -1.000112 | -2.458104 |
| C | 1.530558  | -0.743936 | -0.269852 |
| N | 0.949257  | 0.667754  | -0.126301 |
| C | 1.274631  | 1.547129  | -1.294625 |
| C | 1.304538  | 1.339557  | 1.160998  |
| N | -1.677648 | 0.567557  | -0.020104 |
| H | 0.942056  | 1.031334  | -2.198263 |
| H | 2.363107  | 1.671053  | -1.343264 |
| C | 0.599719  | 2.909224  | -1.184179 |
| C | 0.643248  | 2.708199  | 1.292982  |
| H | 2.396020  | 1.446028  | 1.211048  |
| H | 0.969389  | 0.684100  | 1.968115  |
| H | 0.903221  | 3.499399  | -2.056790 |
| C | 0.983866  | 3.611199  | 0.113153  |
| H | -0.491919 | 2.803590  | -1.251923 |

|    |           |           |           |
|----|-----------|-----------|-----------|
| H  | 0.983417  | 3.147718  | 2.238142  |
| H  | -0.446360 | 2.600324  | 1.382359  |
| H  | 0.469316  | 4.574078  | 0.201881  |
| H  | 2.061306  | 3.824857  | 0.110565  |
| H  | -1.024581 | -3.780436 | -0.472747 |
| C  | 2.025674  | -1.663881 | 2.052775  |
| H  | 1.400795  | -1.940792 | 2.905032  |
| H  | 2.531108  | -0.728871 | 2.279489  |
| H  | 2.778461  | -2.439461 | 1.882300  |
| C  | -2.362432 | -0.006360 | -1.213185 |
| H  | -1.909823 | 1.569259  | 0.007436  |
| C  | -2.182992 | -0.036523 | 1.244849  |
| C  | -3.873322 | 0.166508  | -1.124990 |
| H  | -2.089010 | -1.065512 | -1.250311 |
| H  | -1.945630 | 0.479446  | -2.103114 |
| C  | -3.691142 | 0.130208  | 1.382309  |
| H  | -1.646827 | 0.431886  | 2.078648  |
| H  | -1.905816 | -1.095244 | 1.216090  |
| H  | -4.339943 | -0.293075 | -2.004208 |
| H  | -4.121873 | 1.237470  | -1.160467 |
| C  | -4.413434 | -0.450282 | 0.165854  |
| H  | -3.931647 | 1.198604  | 1.485119  |
| H  | -4.024841 | -0.356867 | 2.306186  |
| H  | -5.492012 | -0.277954 | 0.247153  |
| H  | -4.268461 | -1.539425 | 0.139413  |
| H  | -0.318497 | 0.534777  | -0.100344 |
| Cl | 3.362815  | -0.576507 | -0.348122 |

2-bromo-N-methylpyridinium+ + pip, proton transfer ts

|   |           |           |           |
|---|-----------|-----------|-----------|
| C | -0.427525 | -3.051154 | -0.379149 |
| C | 0.035298  | -2.385193 | -1.557374 |
| C | 0.007169  | -2.572433 | 0.816556  |
| N | 0.742987  | -1.401961 | 0.965281  |
| H | -0.197037 | -3.082491 | 1.754800  |
| H | -0.156735 | -2.812819 | -2.539390 |
| C | 0.765909  | -1.242230 | -1.466416 |
| H | 1.218623  | -0.819993 | -2.356688 |
| C | 1.117990  | -0.620494 | -0.169692 |
| N | 0.539243  | 0.788465  | -0.067590 |
| C | 0.891720  | 1.659509  | -1.235302 |
| C | 0.825855  | 1.490429  | 1.221250  |
| N | -2.085594 | 0.570061  | -0.053868 |
| H | 0.609206  | 1.127009  | -2.145104 |
| H | 1.977813  | 1.804952  | -1.237771 |
| C | 0.176986  | 3.003568  | -1.175848 |
| C | 0.128196  | 2.844408  | 1.302286  |
| H | 1.912976  | 1.615673  | 1.311895  |
| H | 0.467119  | 0.845039  | 2.025188  |



|    |           |           |           |
|----|-----------|-----------|-----------|
| H  | 0.498968  | 3.585247  | -2.047425 |
| C  | 0.491151  | 3.737356  | 0.122153  |
| H  | -0.908252 | 2.865475  | -1.282087 |
| H  | 0.419560  | 3.305795  | 2.253255  |
| H  | -0.961188 | 2.708345  | 1.349493  |
| H  | -0.051489 | 4.687366  | 0.174679  |
| H  | 1.562024  | 3.979286  | 0.157574  |
| H  | -1.010848 | -3.964732 | -0.420016 |
| C  | 1.555108  | -1.393842 | 2.207232  |
| H  | 0.884051  | -1.552897 | 3.055475  |
| H  | 2.078509  | -0.452060 | 2.331231  |
| H  | 2.299594  | -2.194650 | 2.163161  |
| C  | -2.682097 | -0.057235 | -1.266755 |
| H  | -2.401841 | 1.548494  | -0.029707 |
| C  | -2.568096 | -0.086365 | 1.193298  |
| C  | -4.204617 | -0.030128 | -1.220859 |
| H  | -2.309493 | -1.086229 | -1.301826 |
| H  | -2.289930 | 0.471057  | -2.143711 |
| C  | -4.088633 | -0.067542 | 1.289824  |
| H  | -2.104215 | 0.426685  | 2.044182  |
| H  | -2.189443 | -1.114143 | 1.170399  |
| H  | -4.600666 | -0.525589 | -2.115134 |
| H  | -4.553179 | 1.012397  | -1.258023 |
| C  | -4.718198 | -0.705762 | 0.051107  |
| H  | -4.433736 | 0.971812  | 1.391155  |
| H  | -4.398551 | -0.591575 | 2.201755  |
| H  | -5.810177 | -0.638517 | 0.103101  |
| H  | -4.468143 | -1.775689 | 0.023338  |
| H  | -0.702768 | 0.628200  | -0.088920 |
| Br | 3.183014  | -0.394422 | -0.252729 |

2-cyano-N-methylpyridinium+ + pip, proton transfer ts

|   |           |           |           |
|---|-----------|-----------|-----------|
| C | -0.194844 | -2.783160 | -0.399466 |
| C | 0.361504  | -2.300113 | -1.628888 |
| C | 0.469947  | -2.483191 | 0.755326  |
| N | 1.505339  | -1.574980 | 0.809442  |
| H | 0.250170  | -2.979675 | 1.698087  |
| H | 0.068350  | -2.759614 | -2.571323 |
| C | 1.341425  | -1.357163 | -1.622518 |
| H | 1.902693  | -1.105452 | -2.518512 |
| C | 1.733943  | -0.705414 | -0.327868 |
| N | 0.935025  | 0.618601  | -0.123200 |
| C | 1.152144  | 1.538905  | -1.284619 |
| C | 1.317944  | 1.284991  | 1.158840  |
| N | -1.679988 | 0.402555  | 0.031910  |
| H | 0.822245  | 1.012865  | -2.185288 |
| H | 2.229404  | 1.740083  | -1.374288 |
| C | 0.403120  | 2.856040  | -1.114717 |

|   |           |           |           |
|---|-----------|-----------|-----------|
| C | 0.565997  | 2.596017  | 1.364111  |
| H | 2.399466  | 1.485893  | 1.140984  |
| H | 1.102800  | 0.578847  | 1.966609  |
| H | 0.644168  | 3.488545  | -1.977127 |
| C | 0.788097  | 3.546110  | 0.190765  |
| H | -0.681974 | 2.690244  | -1.155182 |
| H | 0.920669  | 3.041074  | 2.301246  |
| H | -0.506721 | 2.406489  | 1.504780  |
| H | 0.211127  | 4.467420  | 0.325467  |
| H | 1.846371  | 3.837689  | 0.151778  |
| H | -0.994976 | -3.516278 | -0.382477 |
| C | 2.548537  | -1.777615 | 1.832037  |
| H | 2.082437  | -2.275884 | 2.684763  |
| H | 2.961251  | -0.824913 | 2.166785  |
| H | 3.358124  | -2.407851 | 1.449883  |
| C | 3.161622  | -0.337090 | -0.400351 |
| N | 4.299471  | -0.023081 | -0.499689 |
| C | -2.365446 | -0.103692 | -1.190882 |
| H | -1.897945 | 1.405589  | 0.099392  |
| C | -2.216712 | -0.237000 | 1.266601  |
| C | -3.871480 | 0.112340  | -1.112325 |
| H | -2.122211 | -1.167853 | -1.267487 |
| H | -1.924240 | 0.404078  | -2.056649 |
| C | -3.719334 | -0.020619 | 1.395185  |
| H | -1.670856 | 0.176224  | 2.123183  |
| H | -1.977180 | -1.302086 | 1.196277  |
| H | -4.342100 | -0.300948 | -2.012083 |
| H | -4.085750 | 1.191317  | -1.112768 |
| C | -4.446722 | -0.530856 | 0.150356  |
| H | -3.923454 | 1.051223  | 1.534875  |
| H | -4.081172 | -0.528852 | 2.296700  |
| H | -5.519567 | -0.324062 | 0.226336  |
| H | -4.339903 | -1.622848 | 0.086190  |
| H | -0.328609 | 0.386146  | -0.058917 |

4-piperidino-4-cyano-N-methylpyridinium+ + piperidine, proton transfer ts, MP2/6-31+G\*

|   |          |           |           |
|---|----------|-----------|-----------|
| N | 3.729948 | -1.016218 | -0.433740 |
| C | 3.625679 | -0.338174 | 0.761174  |
| C | 2.619468 | -1.712195 | -0.849344 |
| C | 1.388825 | -1.536243 | -0.298229 |
| H | 2.782463 | -2.440465 | -1.640084 |
| H | 4.563507 | -0.012996 | 1.204995  |
| C | 2.439129 | -0.125336 | 1.390027  |
| H | 2.446926 | 0.321813  | 2.379516  |
| C | 1.138387 | -0.503295 | 0.754969  |
| N | 0.377990 | 0.734324  | 0.166084  |
| C | 1.075364 | 1.254901  | -1.042925 |
| C | 0.249028 | 1.816241  | 1.188360  |

|   |           |           |           |
|---|-----------|-----------|-----------|
| H | -0.850103 | 0.353362  | -0.127156 |
| H | 1.146004  | 0.436566  | -1.764377 |
| H | 2.096311  | 1.547190  | -0.752972 |
| C | 0.331604  | 2.444819  | -1.638463 |
| C | -0.521036 | 3.008761  | 0.631052  |
| H | 1.255520  | 2.138913  | 1.487329  |
| H | -0.253190 | 1.393634  | 2.066710  |
| H | 0.890935  | 2.792210  | -2.515195 |
| C | 0.163643  | 3.562393  | -0.614426 |
| H | -0.652910 | 2.123596  | -2.008140 |
| H | -0.588110 | 3.769860  | 1.417495  |
| H | -1.552167 | 2.718238  | 0.389652  |
| H | -0.413972 | 4.391692  | -1.037115 |
| H | 1.149312  | 3.965800  | -0.344990 |
| H | 0.576831  | -2.179978 | -0.621932 |
| C | 5.055749  | -1.381367 | -0.947927 |
| H | 4.973552  | -1.599262 | -2.013646 |
| H | 5.455655  | -2.255115 | -0.423091 |
| H | 5.731025  | -0.534505 | -0.817793 |
| C | 0.198415  | -1.048271 | 1.754016  |
| N | -0.584687 | -1.507894 | 2.515606  |
| N | -2.094773 | 0.019039  | -0.406852 |
| C | -2.163713 | -1.336224 | -1.025503 |
| H | -2.401068 | 0.698738  | -1.116671 |
| C | -3.029184 | 0.129078  | 0.755149  |
| C | -4.462365 | -0.178894 | 0.341136  |
| H | -2.936593 | 1.139231  | 1.166566  |
| H | -2.675964 | -0.577538 | 1.512730  |
| C | -3.579760 | -1.677020 | -1.471816 |
| H | -1.819505 | -2.046457 | -0.264032 |
| H | -1.458072 | -1.356100 | -1.864050 |
| C | -4.557616 | -1.562382 | -0.302274 |
| H | -4.813637 | 0.588414  | -0.364380 |
| H | -5.108383 | -0.113219 | 1.224190  |
| H | -3.588172 | -2.689087 | -1.893070 |
| H | -3.879749 | -0.995821 | -2.281439 |
| H | -5.580581 | -1.753048 | -0.643804 |
| H | -4.324898 | -2.331163 | 0.447211  |
